# Supplementary material
Source: publisher site journal article supplement (https://www.spandidos-publications.com/2627/downloadSupplementary)
Supplement: Supplementary file 2 [file downloadSupplementary]

## Sheet: Table S4 DDX41_vs_Ctrl_Sig_DEG
Table SIV. DDX41_vs_Ctrl_Sig_DEG.
Gene	logFC	logCPM	P-value	FDR	Ctrl_1st	Ctrl_2nd	DDX41_1st	DDX41_2nd	Symbol	Chr	GeneType	Description
ENSG00000185710.9	0.75806	2.69399	5.1247e-07	0.000346096	0.61	1.03	1.06	1.56	SMG1P4	chr16	transcribed_unprocessed_pseudogene	SMG1 pseudogene 4
ENSG00000223861.1	1.64033	-0.691761	4.61099e-05	0.00936387	0.11	0.81	1.32	1.41	RP11-74C1.2	chr1	processed_pseudogene	--
ENSG00000227001.3	-1.54584	-1.0374	0.000919602	0.0556698	0.72	0.91	0.25	0.27	NBPF2P	chr1	unprocessed_pseudogene	neuroblastoma breakpoint family, member 2, pseudogene
ENSG00000225217.1	7.28565	-1.36663	9.40334e-12	1.60631e-08	0	0	0.18	0.35	HSPA7	chr1	unprocessed_pseudogene	heat shock 70kDa protein 7 (HSP70B)
ENSG00000244122.2	-5.05258	-2.92016	0.00810984	0.182001	0.01	0.09	0	0	UGT1A7	chr2	protein_coding	UDP glucuronosyltransferase 1 family, polypeptide A7
ENSG00000230772.1	1.60057	-1.71148	0.00938088	0.198268	0.03	0.21	0.13	0.56	VN1R108P	chr20	unprocessed_pseudogene	vomeronasal 1 receptor 108 pseudogene
ENSG00000271717.1	5.0371	-2.92014	0.00810984	0.182001	0	0	0.62	0	CTD-3020H12.4	chr19	antisense	--
ENSG00000213411.2	-2.95407	-2.1654	0.0008382	0.0523469	0.14	0.13	0	0.03	RBM22P2	chr13	processed_pseudogene	RNA binding motif protein 22 pseudogene 2
ENSG00000188536.12	-2.58245	-2.01298	0.00100415	0.0592694	0.09	0.8	0.09	0.04	HBA2	chr16	protein_coding	hemoglobin, alpha 2
ENSG00000276476.2	-0.777376	0.759443	0.00144059	0.0722534	0.88	0.57	0.45	0.35	LINC00540	chr13	lincRNA	long intergenic non-protein coding RNA 540
ENSG00000148346.11	-1.11566	-0.112874	0.000588365	0.041512	1.1	0.82	0.39	0.45	LCN2	chr9	protein_coding	lipocalin 2
ENSG00000264346.1	1.47467	-1.06287	0.00134535	0.0688228	1.57	1.37	3.26	4.55	SNORA77	chr22	snoRNA	small nucleolar RNA, H/ACA box 77
ENSG00000279686.1	-5.49992	-2.67229	0.0010506	0.0600581	0.14	0.17	0	0	ECSCR	chr5	protein_coding	endothelial cell surface expressed chemotaxis and apoptosis regulator
ENSG00000267213.4	-1.42648	-1.42844	0.00917912	0.19629	0.49	0.29	0.14	0.13	AC007773.2	chr19	antisense	--
ENSG00000233469.1	-5.05236	-2.92027	0.00810984	0.182001	0.22	0.23	0	0	ST6GALNAC4P1	chr13	processed_pseudogene	ST6 (alpha-N-acetyl-neuraminyl-2,3-beta-galactosyl-1,3)-N-acetylgalactosaminide alpha-2,6-sialyltransferase 4 pseudogene 1
ENSG00000227536.1	1.70798	-1.49388	0.00236042	0.0930076	0	0.15	0.29	0.17	SOCS5P4	chrX	processed_pseudogene	suppressor of cytokine signaling 5 pseudogene 4
ENSG00000166317.11	-1.0608	0.239794	0.000231674	0.0249178	0.26	0.25	0.1	0.13	SYNPO2L	chr10	protein_coding	synaptopodin 2-like
ENSG00000278665.1	1.29237	-1.08693	0.00502989	0.144479	0.38	0.15	1.06	0.21	RP11-666O2.4	chr16	unprocessed_pseudogene	--
ENSG00000274897.2	1.99399	-1.16582	6.6217e-05	0.011795	0.13	0.02	0.31	0.28	PANO1	chr11	protein_coding	proapoptotic nucleolar protein 1
ENSG00000234694.1	-3.30736	-2.52799	0.00367993	0.12271	0.3	0.22	0	0.04	RP1-92O14.3	chr1	antisense	--
ENSG00000206910.1	1.23865	-0.381315	0.000394455	0.0335923	2.21	2.85	6.21	5.17	SNORA29	chr6	snoRNA	small nucleolar RNA, H/ACA box 29
ENSG00000203279.3	0.90371	-0.350325	0.00789422	0.182001	0.21	0.85	1.01	0.87	RP11-498P14.5	chr9	lincRNA	--
ENSG00000204388.6	2.36826	7.51464	4.77785e-97	3.46872e-93	15.33	24.75	84.19	111.62	HSPA1B	chr6	protein_coding	heat shock 70kDa protein 1B
ENSG00000227081.5	-0.70987	0.579858	0.00592609	0.15979	7.26	4.59	4.05	2.84	RP11-543P15.1	chr12	processed_pseudogene	--
ENSG00000280402.1	3.35316	-1.87662	2.56121e-05	0.00619812	0.04	0	0.1	0.28	RP11-20I23.10	chr16	TEC	--
ENSG00000110031.12	-0.891298	1.07502	5.12083e-05	0.00986448	1.25	0.94	0.72	0.4	LPXN	chr11	protein_coding	leupaxin
ENSG00000183801.7	-1.38352	-0.598043	0.000390696	0.0334685	0.26	0.25	0.1	0.08	OLFML1	chr11	protein_coding	olfactomedin-like 1
ENSG00000175820.3	1.49926	-0.636146	0.000171634	0.0206815	0.01	0.02	0.02	0.05	CCDC168	chr13	protein_coding	coiled-coil domain containing 168
ENSG00000179873.14	-5.21734	-2.83285	0.00409817	0.126877	0.05	0.02	0	0	NLRP11	chr19	protein_coding	NLR family, pyrin domain containing 11
ENSG00000198203.9	-3.4204	-2.46096	0.00200016	0.0856591	0.1	0.03	0	0.01	SULT1C2	chr2	protein_coding	sulfotransferase family, cytosolic, 1C, member 2
ENSG00000183484.11	1.16971	-0.478762	0.00157175	0.0768409	0.09	0.09	0.09	0.3	GPR132	chr14	protein_coding	G protein-coupled receptor 132
ENSG00000257243.1	1.4578	-1.27646	0.00372147	0.12351	0.1	0.47	0.85	0.67	RP11-133N21.7	chr12	processed_pseudogene	--
ENSG00000181126.13	-0.781449	0.156037	0.00625272	0.165064	0.22	0.18	0.07	0.15	HLA-V	chr6	transcribed_unprocessed_pseudogene	major histocompatibility complex, class I, V (pseudogene)
ENSG00000269946.1	5.20115	-2.83318	0.00409817	0.126877	0	0	0.23	0.77	RP11-2B6.3	chr9	lincRNA	--
ENSG00000140876.11	-0.693138	0.887915	0.00269151	0.10182	1.31	1.06	0.89	0.5	NUDT7	chr16	protein_coding	nudix (nucleoside diphosphate linked moiety X)-type motif 7
ENSG00000111087.9	1.22359	-0.445078	0.000618972	0.0430022	0.14	0.05	0.22	0.2	GLI1	chr12	protein_coding	GLI family zinc finger 1
ENSG00000229127.1	0.977207	-0.445006	0.00566511	0.156086	0.2	0.14	0.32	0.33	AC007038.7	chr2	antisense	--
ENSG00000154342.5	-5.36586	-2.75018	0.00207364	0.0856591	0.01	0.09	0	0	WNT3A	chr1	protein_coding	wingless-type MMTV integration site family, member 3A
ENSG00000278974.1	1.72512	-1.63529	0.00399557	0.126877	0	0.26	0.28	0.53	RP11-756P10.6	chr4	TEC	--
ENSG00000273373.1	0.589065	3.47165	1.01725e-05	0.00310956	2.57	2.69	3.63	3.86	RP5-1074L1.4	chr1	antisense	--
ENSG00000223872.1	-0.741737	0.419985	0.00525559	0.149191	2	2.98	1.29	1.51	AC006372.5	chr7	lincRNA	--
ENSG00000272949.1	-0.867008	1.21115	4.66112e-05	0.00939758	0.38	1.02	0.43	0.3	RP11-514P8.8	chr7	processed_transcript	--
ENSG00000232536.1	1.815	-1.75114	0.00437312	0.132242	0.21	0.11	0.21	0.88	RP11-74C1.4	chr1	sense_intronic	--
ENSG00000181029.8	0.800667	0.188321	0.00437617	0.132242	0.07	0.16	0.21	0.18	TRAPPC5	chr19	protein_coding	trafficking protein particle complex 5
ENSG00000278189.1	-8.10312	-0.670567	6.14259e-20	1.48651e-16	0	12.68	0	0	RNA5-8S5	chr21	rRNA	RNA, 5.8S ribosomal 5
ENSG00000172382.9	-0.615335	0.969014	0.00655899	0.170828	1.71	1.74	1.15	0.98	PRSS27	chr16	protein_coding	protease, serine 27
ENSG00000232940.5	1.46761	-0.731007	0.000275888	0.0259409	0.28	0.2	0.6	0.67	HCG25	chr6	antisense	HLA complex group 25 (non-protein coding)
ENSG00000224315.2	-3.18489	-2.59819	0.00674452	0.172413	0.04	0.41	0	0.04	RPL7P7	chr1	processed_pseudogene	ribosomal protein L7 pseudogene 7
ENSG00000251281.1	2.00125	-1.83314	0.00293082	0.106389	0.26	0.07	0.64	0.67	CTD-2066L21.2	chr5	lincRNA	--
ENSG00000253227.1	-0.732044	0.730933	0.00196078	0.0856591	2.99	3.15	1.57	1.92	RP11-383J24.1	chr8	lincRNA	--
ENSG00000100314.3	-1.47933	-1.39689	0.00626582	0.165064	0.12	0.12	0.01	0.07	CABP7	chr22	protein_coding	calcium binding protein 7
ENSG00000270540.1	6.09969	-2.27709	1.82551e-05	0.0046914	0	0	0.05	0.23	RP11-785G17.1	chr2	antisense	--
ENSG00000278022.1	0.862707	0.309177	0.00149143	0.0743512	1.77	1.31	3.79	1.58	RP11-35O15.2	chr15	sense_intronic	--
ENSG00000243175.1	6.18121	-2.2204	9.33195e-06	0.00297802	0	0	0.11	0.27	RP11-58H15.1	chr4	transcribed_processed_pseudogene	--
ENSG00000254860.5	0.615375	0.95551	0.0059879	0.160511	1.39	1	1.73	1.74	TMEM9B-AS1	chr11	antisense	TMEM9B antisense RNA 1
ENSG00000050165.17	-0.852582	1.56755	9.02341e-06	0.00295958	1.1	1	0.46	0.64	DKK3	chr11	protein_coding	dickkopf WNT signaling pathway inhibitor 3
ENSG00000153993.13	1.03933	-0.672987	0.00705118	0.177	0.06	0.03	0.08	0.1	SEMA3D	chr7	protein_coding	sema domain, immunoglobulin domain (Ig), short basic domain, secreted, (semaphorin) 3D
ENSG00000231887.6	-1.04032	0.428917	0.000122829	0.0170668	1.59	1.44	0.76	0.64	PRH1	chr12	protein_coding	proline-rich protein HaeIII subfamily 1
ENSG00000281406.1	1.21832	-0.153201	0.000205101	0.0232662	0.13	0.15	0.23	0.4	BLACAT1	chr1	lincRNA	bladder cancer associated transcript 1 (non-protein coding)
ENSG00000165698.15	-0.615333	2.14094	0.00025707	0.0256926	1.78	1.39	1.05	0.92	C9orf9	chr9	protein_coding	chromosome 9 open reading frame 9
ENSG00000102387.15	5.03588	-2.92075	0.00810984	0.182001	0	0	0	0.08	TAF7L	chrX	protein_coding	TAF7-like RNA polymerase II, TATA box binding protein (TBP)-associated factor, 50kDa
ENSG00000256546.1	1.90834	-0.770228	7.00749e-06	0.00245178	0.09	0.11	0.52	0.21	AC156455.1	chr12	processed_transcript	--
ENSG00000076641.4	-0.628025	1.82668	0.000427814	0.0348348	0.39	0.28	0.14	0.27	PAG1	chr8	protein_coding	phosphoprotein membrane anchor with glycosphingolipid microdomains 1
ENSG00000261522.5	5.60583	-2.59901	0.000532974	0.0396861	0	0	0	0.15	RP11-407P15.1	chr2	transcribed_unprocessed_pseudogene	--
ENSG00000259065.1	-1.49034	-1.27665	0.00372147	0.12351	0.93	0.6	0.09	0.41	RP5-1021I20.1	chr14	antisense	--
ENSG00000278869.1	-0.763511	1.26961	0.000207342	0.0233435	2.94	2.8	1.39	1.8	CITF22-49E9.3	chr22	lincRNA	--
ENSG00000169758.12	-1.08051	-0.262005	0.00157462	0.0768522	0.38	0.33	0.14	0.17	C15orf27	chr15	protein_coding	chromosome 15 open reading frame 27
ENSG00000137491.14	1.24188	-0.875811	0.00320937	0.113659	0.03	0.07	0.14	0.1	SLCO2B1	chr11	protein_coding	solute carrier organic anion transporter family, member 2B1
ENSG00000222033.1	-1.24916	-0.750125	0.00238682	0.0939203	0.3	0.3	0.13	0.11	LINC01124	chr2	lincRNA	long intergenic non-protein coding RNA 1124
ENSG00000262514.1	2.55107	-2.01357	0.00100415	0.0592694	0.07	0	0.25	0.17	RP11-96D1.9	chr16	sense_intronic	--
ENSG00000115318.11	0.79292	-0.00109351	0.00817721	0.182234	0.1	0.18	0.28	0.18	LOXL3	chr2	protein_coding	lysyl oxidase-like 3
ENSG00000073282.12	-0.758785	0.925439	0.000728933	0.0472505	0.31	0.3	0.16	0.18	TP63	chr3	protein_coding	tumor protein p63
ENSG00000182993.3	-0.799737	1.40679	5.9758e-05	0.0109834	1.52	1.81	0.85	0.95	C12orf60	chr12	protein_coding	chromosome 12 open reading frame 60
ENSG00000227543.4	-0.829659	0.472065	0.00115155	0.0623897	0.38	0.51	0.17	0.3	SPAG5-AS1	chr17	processed_transcript	SPAG5 antisense RNA 1
ENSG00000255176.1	-1.36071	-0.897279	0.0018712	0.0838671	0.2	0.64	0.18	0.13	AP002954.3	chr11	antisense	--
ENSG00000196917.5	-5.05221	-2.92034	0.00810984	0.182001	0.04	0.01	0	0	HCAR1	chr12	protein_coding	hydroxycarboxylic acid receptor 1
ENSG00000245534.6	1.23765	-0.381765	0.000394455	0.0335923	0.18	0.27	0.43	0.58	RORA-AS1	chr15	antisense	RORA antisense RNA 1
ENSG00000273035.1	5.20145	-2.83303	0.00409817	0.126877	0	0	0.23	0.27	RP11-449G16.1	chr2	sense_intronic	--
ENSG00000259251.2	-2.57297	-2.39669	0.00795712	0.182001	0.13	0.06	0.03	0	RP11-643M14.1	chr15	antisense	--
ENSG00000219438.8	5.34885	-2.75092	0.00207364	0.0856591	0	0	0	0.09	FAM19A5	chr22	protein_coding	family with sequence similarity 19 (chemokine (C-C motif)-like), member A5
ENSG00000266904.5	-0.970292	-0.125787	0.00288762	0.106147	0.2	0.24	0.08	0.13	CTC-559E9.1	chr19	lincRNA	--
ENSG00000279777.1	0.753518	2.03817	1.13951e-05	0.00341148	7.04	6.62	10.06	11.72	AC004813.1	chr12	protein_coding	--
ENSG00000133943.20	1.03262	0.0787562	0.000583088	0.041512	0.13	0.12	0.2	0.28	C14orf159	chr14	protein_coding	chromosome 14 open reading frame 159
ENSG00000256235.1	1.13296	-0.397758	0.00117765	0.0633312	0.2	0.11	0.24	0.41	SMIM3	chr5	protein_coding	small integral membrane protein 3
ENSG00000230023.2	5.03649	-2.92044	0.00810984	0.182001	0	0	0.06	0.06	RP11-10N16.2	chr1	lincRNA	--
ENSG00000235097.1	-2.33747	-1.63468	0.000253607	0.0256926	0.21	0.15	0.05	0.01	LINC00330	chr13	lincRNA	long intergenic non-protein coding RNA 330
ENSG00000231804.1	-5.21778	-2.83263	0.00409817	0.126877	0	0.54	0	0	RP11-317B17.3	chr9	processed_pseudogene	--
ENSG00000230319.1	5.03619	-2.9206	0.00810984	0.182001	0	0	0.03	0.07	AL022476.2	chr22	antisense	--
ENSG00000246465.1	-0.982489	-0.46099	0.00743123	0.181896	0.38	0.22	0.13	0.16	RP11-57A19.2	chr16	lincRNA	--
ENSG00000235284.1	2.23633	-1.92067	0.00181332	0.082406	0.65	0.66	2.53	3.61	SNORD62A	chr9	snoRNA	small nucleolar RNA, C/D box 62A
ENSG00000110693.15	5.48381	-2.67258	0.0010506	0.0600581	0	0	0.01	0.02	SOX6	chr11	protein_coding	SRY (sex determining region Y)-box 6
ENSG00000167207.11	-1.58855	-0.527168	3.58331e-05	0.00787838	0.14	0.22	0.08	0.03	NOD2	chr16	protein_coding	nucleotide-binding oligomerization domain containing 2
ENSG00000267500.1	-1.80593	-0.770671	2.36826e-05	0.00597573	0.54	0.45	0.04	0.22	CTD-2006C1.6	chr19	transcribed_unprocessed_pseudogene	--
ENSG00000278829.1	0.980103	1.50316	7.14649e-07	0.000451161	2.43	1.43	2.69	4.51	RP11-358B23.7	chr17	sense_intronic	--
ENSG00000229474.6	-5.62254	-2.59841	0.000532974	0.0396861	0.12	0.04	0	0	PATL2	chr15	protein_coding	protein associated with topoisomerase II homolog 2 (yeast)
ENSG00000145244.11	-1.57179	-0.178171	3.55015e-06	0.00156207	0.2	0.19	0.08	0.04	CORIN	chr4	protein_coding	corin, serine peptidase
ENSG00000246523.7	-2.03668	-2.06261	0.00800342	0.182001	0.34	0.05	0	0.08	RP11-736K20.6	chr11	lincRNA	--
ENSG00000232485.2	1.84025	-1.56297	0.0016566	0.0797414	0.08	0.1	0.31	0.3	AC098820.3	chr2	processed_transcript	--
ENSG00000234709.2	2.21504	-2.21983	0.0082457	0.182234	0.04	0.07	0.35	0.17	UPF3AP3	chr9	transcribed_processed_pseudogene	UPF3A pseudogene 3
ENSG00000236514.1	-2.02667	-1.30507	0.000166121	0.0204389	0.48	0.66	0.23	0.03	RP11-162G10.5	chr10	antisense	--
ENSG00000178093.13	0.877285	-0.0883147	0.00579398	0.158136	0.36	0.35	0.48	0.76	TSSK6	chr19	protein_coding	testis-specific serine kinase 6
ENSG00000228372.7	3.15527	-2.59855	0.00674452	0.172413	0	0.03	0.13	0.15	RP11-85L21.4	chrX	lincRNA	--
ENSG00000241547.1	0.733282	0.480477	0.00405787	0.126877	1.86	1.77	3.19	2.54	ACTG1P20	chr1	processed_pseudogene	actin gamma 1 pseudogene 20
ENSG00000164532.10	0.705046	0.463666	0.00598259	0.160511	0.45	0.46	0.86	0.55	TBX20	chr7	protein_coding	T-box 20
ENSG00000164400.5	-1.67727	-1.39681	0.00213567	0.0873517	0.57	0.47	0.07	0.23	CSF2	chr5	protein_coding	colony stimulating factor 2 (granulocyte-macrophage)
ENSG00000219298.1	-2.22392	-1.71041	0.000685443	0.0457476	0.25	0.98	0.15	0.09	RP11-472G23.3	chr6	processed_pseudogene	--
ENSG00000157404.15	-5.21712	-2.83296	0.00409817	0.126877	0.05	0	0	0	KIT	chr4	protein_coding	v-kit Hardy-Zuckerman 4 feline sarcoma viral oncogene homolog
ENSG00000185684.12	-0.63271	1.84753	0.000429127	0.0348348	1.53	1.32	0.72	1.02	EP400NL	chr12	protein_coding	EP400 N-terminal like
ENSG00000196756.11	0.6471	4.66335	5.11031e-08	5.11736e-05	13.26	12.94	18.57	20.26	SNHG17	chr20	processed_transcript	small nucleolar RNA host gene 17
ENSG00000266897.1	2.20772	-0.654272	1.2883e-07	0.00011337	0.36	0.51	1.67	2.18	AC005546.2	chr19	lincRNA	--
ENSG00000279738.1	1.0178	1.34102	7.62008e-07	0.000461015	0.07	0.08	0.14	0.14	RP5-1014D13.2	chr22	sense_overlapping	--
ENSG00000260329.1	-0.657512	1.6767	0.000415497	0.0348348	2.18	2.27	1.4	1.27	RP11-412D9.4	chr12	antisense	--
ENSG00000230882.1	-0.648328	1.92153	0.000212666	0.0237532	1.13	1.09	0.5	0.84	AC005077.14	chr7	processed_pseudogene	--
ENSG00000177688.6	3.37892	-0.833607	4.82031e-11	6.6658e-08	0	0.13	0.59	0.78	SUMO4	chr6	protein_coding	small ubiquitin-like modifier 4
ENSG00000183018.8	-1.07563	0.556927	2.81953e-05	0.00655034	0.42	0.52	0.32	0.11	SPNS2	chr17	protein_coding	spinster homolog 2 (Drosophila)
ENSG00000276601.1	5.20145	-2.83303	0.00409817	0.126877	0	0	0.38	0.45	Metazoa_SRP	chr17	misc_RNA	--
ENSG00000157703.15	3.85392	-2.16536	9.13306e-05	0.0141024	0.01	0	0.17	0.06	SVOPL	chr7	protein_coding	SVOP-like
ENSG00000234618.1	-1.75657	-1.21937	0.00055755	0.040887	0.41	0.67	0.21	0.09	RPSAP9	chr9	processed_pseudogene	ribosomal protein SA pseudogene 9
ENSG00000249485.1	-1.00966	-0.493361	0.0066177	0.171741	0.37	0.78	0.32	0.22	RBBP4P1	chr5	processed_pseudogene	retinoblastoma binding protein 4 pseudogene 1
ENSG00000204539.3	-3.30758	-2.52788	0.00367993	0.12271	0.04	0.09	0	0.01	CDSN	chr6	protein_coding	corneodesmosin
ENSG00000173825.6	-1.06683	-0.562647	0.00514884	0.146879	0.43	0.27	0.18	0.14	TIGD3	chr11	protein_coding	tigger transposable element derived 3
ENSG00000197238.4	-0.879935	1.01709	6.47491e-05	0.0116531	5.19	6.42	2.98	2.98	HIST1H4J	chr6	protein_coding	histone cluster 1, H4j
ENSG00000277895.1	-5.05236	-2.92027	0.00810984	0.182001	0.09	0.09	0	0	RP11-114F3.4	chr12	antisense	--
ENSG00000116183.10	1.04527	-0.791195	0.00972217	0.203556	0.03	0.02	0.06	0.05	PAPPA2	chr1	protein_coding	pappalysin 2
ENSG00000223839.7	1.413	0.0210867	5.76763e-06	0.00215254	0.04	0.07	0.11	0.17	FAM95B1	chr9	lincRNA	family with sequence similarity 95, member B1
ENSG00000230943.1	5.34885	-2.75092	0.00207364	0.0856591	0	0	0	0.41	RP11-367G18.1	chr6	lincRNA	--
ENSG00000269967.1	2.16334	-1.96628	0.00299422	0.108015	0	0.19	0.42	0.44	RP11-84A19.4	chr1	lincRNA	--
ENSG00000274276.4	-2.1948	-1.9663	0.00299422	0.108015	0.17	0.03	0.01	0.03	CBS	chr21	protein_coding	cystathionine-beta-synthase
ENSG00000225091.3	1.43401	0.601732	2.67221e-08	2.77147e-05	4.82	5.11	10.33	15.05	SNORA71A	chr20	snoRNA	small nucleolar RNA, H/ACA box 71A
ENSG00000253716.5	1.5461	0.197565	1.78814e-07	0.000148364	0.49	0.47	1.18	1.5	LINC01604	chr8	antisense	long intergenic non-protein coding RNA 1604
ENSG00000170374.5	5.03604	-2.92067	0.00810984	0.182001	0	0	0.01	0.06	SP7	chr12	protein_coding	Sp7 transcription factor
ENSG00000186354.10	0.923739	0.400666	0.000576935	0.041512	0.18	0.11	0.24	0.28	C9orf47	chr9	protein_coding	chromosome 9 open reading frame 47
ENSG00000276493.1	-3.88261	-2.16532	9.13306e-05	0.0141024	0.87	0.88	0	0.09	Metazoa_SRP	chr1	misc_RNA	--
ENSG00000272936.1	1.18171	-0.989413	0.0072625	0.179339	0.5	0.31	1.21	0.55	RP11-700J17.2	chr4	antisense	--
ENSG00000259265.1	-5.21748	-2.83278	0.00409817	0.126877	0.13	0.16	0	0	RP11-809H16.4	chr15	antisense	--
ENSG00000172421.7	0.815092	-0.125952	0.00929144	0.197673	0.32	0.28	0.57	0.43	EFCAB3	chr17	protein_coding	EF-hand calcium binding domain 3
ENSG00000120051.14	-0.629426	0.847995	0.00590027	0.159538	0.47	0.54	0.27	0.35	CFAP58	chr10	protein_coding	cilia and flagella associated protein 58
ENSG00000256436.1	1.41552	-0.692032	0.000352271	0.0309062	0.22	0.28	0.56	0.71	TAS2R31	chr12	protein_coding	taste receptor, type 2, member 31
ENSG00000272269.1	0.764201	0.166298	0.00833818	0.183301	0.49	0.73	0.75	1.21	RP11-500C11.3	chr6	antisense	--
ENSG00000243232.4	-1.34391	-0.989479	0.00305889	0.109532	0.06	0.12	0.01	0.05	PCDHAC2	chr5	protein_coding	protocadherin alpha subfamily C, 2
ENSG00000154175.16	-2.89402	-1.49356	5.47109e-06	0.00209053	0.05	0.07	0.01	0	ABI3BP	chr3	protein_coding	ABI family, member 3 (NESH) binding protein
ENSG00000272050.1	5.03679	-2.92029	0.00810984	0.182001	0	0	0.22	0.07	RP13-379O24.3	chr20	lincRNA	--
ENSG00000186369.9	-5.36593	-2.75014	0.00207364	0.0856591	0	0.08	0	0	LINC00643	chr14	lincRNA	long intergenic non-protein coding RNA 643
ENSG00000231353.1	-1.73951	-1.4939	0.00236042	0.0930076	1.73	1.21	0.52	0.3	RP11-5P18.3	chr1	unprocessed_pseudogene	--
ENSG00000206834.1	0.789049	1.16612	0.000239337	0.025274	11.23	9.66	16.08	18.09	SNORA1	chr11	snoRNA	small nucleolar RNA, H/ACA box 1
ENSG00000101049.14	0.996945	-0.127284	0.00198883	0.0856591	0.12	0.2	0.16	0.46	SGK2	chr20	protein_coding	serum/glucocorticoid regulated kinase 2
ENSG00000274776.1	1.37029	0.0336387	7.219e-06	0.00249571	0.23	0.12	0.5	0.36	RP11-687F6.5	chr18	lincRNA	--
ENSG00000124610.4	2.23647	-1.92045	0.00181332	0.082406	0	0.18	0.42	0.4	HIST1H1A	chr6	protein_coding	histone cluster 1, H1a
ENSG00000217159.2	1.19264	-1.06275	0.00851815	0.186411	0.96	0.49	1.49	1.68	LARP1P1	chr6	processed_pseudogene	La ribonucleoprotein domain family, member 1 pseudogene 1
ENSG00000202538.1	-3.42098	-2.46067	0.00200016	0.0856591	0.4	2.23	0	0.18	RNU4-2	chr12	snRNA	RNA, U4 small nuclear 2
ENSG00000159588.14	1.19836	0.0779887	7.17499e-05	0.0119064	0.25	0.2	0.29	0.69	CCDC17	chr1	protein_coding	coiled-coil domain containing 17
ENSG00000281398.2	0.648367	3.04619	4.99139e-06	0.00193267	5.94	6.63	8.19	10.43	SNHG4	chr5	processed_transcript	small nucleolar RNA host gene 4
ENSG00000226950.6	0.59425	3.41232	9.45179e-06	0.00298348	4.04	2.89	5.5	4.42	DANCR	chr4	processed_transcript	differentiation antagonizing non-protein coding RNA
ENSG00000267809.1	-1.47722	-0.989248	0.00118809	0.063423	0.71	0.5	0.3	0.11	NDUFV2P1	chr19	processed_pseudogene	NADH dehydrogenase (ubiquinone) flavoprotein 2 pseudogene 1
ENSG00000127415.12	-5.21741	-2.83281	0.00409817	0.126877	0.06	0.05	0	0	IDUA	chr4	protein_coding	iduronidase, alpha-L-
ENSG00000168631.11	1.59788	-1.56308	0.00546884	0.152176	0.03	0.01	0.06	0.06	DPCR1	chr6	protein_coding	diffuse panbronchiolitis critical region 1
ENSG00000279894.1	1.87257	-1.24833	0.000251898	0.0256926	0.09	0.02	0.19	0.2	GHc-857G6.7	chrX	TEC	--
ENSG00000178977.3	-0.886273	0.250259	0.00195324	0.0856591	0.65	0.55	0.39	0.22	LINC00324	chr17	lincRNA	long intergenic non-protein coding RNA 324
ENSG00000154274.14	-1.63345	-1.71066	0.00938088	0.198268	0.12	0.1	0.05	0.02	C4orf19	chr4	protein_coding	chromosome 4 open reading frame 19
ENSG00000280138.1	1.21893	4.86706	7.32859e-25	2.12822e-21	0.78	0.82	1.56	1.96	RP11-463O12.5	chr12	TEC	--
ENSG00000137648.16	-0.610414	0.949931	0.0059879	0.160511	0.4	0.29	0.2	0.23	TMPRSS4	chr11	protein_coding	transmembrane protease, serine 4
ENSG00000276663.1	3.39154	-2.46103	0.00200016	0.0856591	0.05	0	0.34	0.27	RP11-407G23.7	chr16	antisense	--
ENSG00000197153.4	-1.16461	-0.942555	0.00854785	0.186639	1.23	1.39	0.79	0.31	HIST1H3J	chr6	protein_coding	histone cluster 1, H3j
ENSG00000012124.14	-1.36812	1.40796	3.34691e-11	5.11549e-08	0.83	1.11	0.41	0.3	CD22	chr19	protein_coding	CD22 molecule
ENSG00000145431.10	-0.950321	-0.139015	0.00372075	0.12351	0.15	0.3	0.05	0.17	PDGFC	chr4	protein_coding	platelet derived growth factor C
ENSG00000152439.12	-1.23923	-0.350246	0.000472003	0.0371558	0.1	0.12	0.04	0.05	ZNF773	chr19	protein_coding	zinc finger protein 773
ENSG00000261122.6	-0.749834	0.327713	0.00729876	0.179836	0.88	0.57	0.43	0.38	FLJ26245	chr16	lincRNA	--
ENSG00000270813.2	5.03664	-2.92037	0.00810984	0.182001	0	0	0.24	0.14	NANOGNBP3	chrX	processed_pseudogene	NANOGNB pseudogene 3
ENSG00000277782.1	5.201	-2.83326	0.00409817	0.126877	0	0	0.07	0.53	RP11-775C24.5	chr15	lincRNA	--
ENSG00000231889.7	-0.885215	-0.138889	0.00671543	0.172413	0.37	0.19	0.16	0.12	TRAF3IP2-AS1	chr6	antisense	TRAF3IP2 antisense RNA 1
ENSG00000187808.4	1.47622	-1.06222	0.00134535	0.0688228	0.16	0.07	0.44	0.2	SOWAHD	chrX	protein_coding	sosondowah ankyrin repeat domain family member D
ENSG00000101850.12	-2.77596	-2.2763	0.00260952	0.09958	0.13	0.11	0.03	0	GPR143	chrX	protein_coding	G protein-coupled receptor 143
ENSG00000167874.6	-1.78174	-1.79093	0.00683229	0.173284	0.29	0.39	0.06	0.12	TMEM88	chr17	protein_coding	transmembrane protein 88
ENSG00000250091.2	-1.29897	-1.1924	0.00832122	0.183186	0.12	0.06	0.04	0.03	DNAH10OS	chr12	protein_coding	dynein, axonemal, heavy chain 10 opposite strand
ENSG00000168779.19	-0.639345	0.694192	0.0073074	0.179836	0.44	0.46	0.21	0.34	SHOX2	chr3	protein_coding	short stature homeobox 2
ENSG00000181085.14	-0.747334	0.701696	0.00171152	0.0811649	0.9	0.72	0.41	0.5	MAPK15	chr8	protein_coding	mitogen-activated protein kinase 15
ENSG00000204086.4	7.04659	-1.56347	4.60421e-10	6.07755e-07	0	0	0.21	0.35	RPA4	chrX	protein_coding	replication protein A4, 30kDa
ENSG00000270016.1	2.10897	-1.56279	0.000427756	0.0348348	0.22	0.11	0.92	0.52	RP11-932O9.8	chr15	antisense	--
ENSG00000187151.7	-1.44373	-1.30565	0.00544045	0.152151	0.17	0.19	0.02	0.1	ANGPTL5	chr11	protein_coding	angiopoietin-like 5
ENSG00000224566.2	5.2013	-2.8331	0.00409817	0.126877	0	0	0.17	0.33	FAM96AP2	chr1	processed_pseudogene	family with sequence similarity 96, member A pseudogene 2
ENSG00000205041.1	0.773881	0.571774	0.00186195	0.0838671	0.67	0.55	1.23	0.76	CTC-425O23.2	chr19	sense_intronic	--
ENSG00000261575.2	1.33947	-0.672402	0.000625471	0.0432468	0.33	0.47	1.13	0.81	RP11-259G18.1	chr17	transcribed_unprocessed_pseudogene	--
ENSG00000143127.12	-0.734225	1.02263	0.000812591	0.0516065	0.31	0.48	0.19	0.26	ITGA10	chr1	protein_coding	integrin, alpha 10
ENSG00000233264.2	0.636517	1.1454	0.00319473	0.113417	0.84	1.11	1.42	1.44	AC006042.8	chr7	processed_pseudogene	--
ENSG00000224934.2	0.724025	0.801173	0.0017609	0.081731	0.35	0.37	0.69	0.44	RP11-441O15.3	chr10	lincRNA	--
ENSG00000237836.5	-3.30736	-2.52799	0.00367993	0.12271	0.21	0.15	0	0.03	PHKA2-AS1	chrX	antisense	PHKA2 antisense RNA 1
ENSG00000248243.1	2.13974	-1.0632	1.0616e-05	0.00321135	0.16	0.2	0.5	1.02	RP11-93K22.13	chr3	lincRNA	--
ENSG00000240639.3	5.03619	-2.9206	0.00810984	0.182001	0	0	0.18	0.51	RN7SL666P	chr20	misc_RNA	RNA, 7SL, cytoplasmic 666, pseudogene
ENSG00000270460.1	5.20115	-2.83318	0.00409817	0.126877	0	0	0.17	0.57	RP11-796E10.1	chr2	lincRNA	--
ENSG00000240668.1	2.51127	-1.49392	3.30931e-05	0.007508	0.02	0.08	0.38	0.18	KRT8P36	chr3	processed_pseudogene	keratin 8 pseudogene 36
ENSG00000257752.1	1.54074	-1.59817	0.00823993	0.182234	0.28	0.04	0.73	0.18	RP11-474L23.3	chr12	processed_pseudogene	--
ENSG00000230732.4	1.14857	0.435993	1.73652e-05	0.00462646	0.54	0.42	0.85	1.17	AC127904.2	chr3	sense_intronic	--
ENSG00000280083.1	-5.62298	-2.59819	0.000532974	0.0396861	0.04	0.13	0	0	RP11-317J9.1	chr2	TEC	--
ENSG00000188277.9	-0.939708	0.0686634	0.00201102	0.0856591	0.5	0.43	0.24	0.22	C15orf62	chr15	protein_coding	chromosome 15 open reading frame 62
ENSG00000255561.6	-0.862401	1.00513	9.63957e-05	0.0145043	0.58	0.95	0.33	0.46	FDXACB1	chr11	protein_coding	ferredoxin-fold anticodon binding domain containing 1
ENSG00000277595.1	2.21534	-2.21983	0.0082457	0.182234	0.15	0	0.53	0.18	RP11-946P6.6	chr12	sense_intronic	--
ENSG00000162998.4	2.46293	-1.528	5.53488e-05	0.0105054	0.04	0.01	0.16	0.08	FRZB	chr2	protein_coding	frizzled-related protein
ENSG00000186564.5	1.32663	-0.898965	0.0018712	0.0838671	0.06	0.04	0.06	0.17	FOXD2	chr1	protein_coding	forkhead box D2
ENSG00000273443.1	-0.622941	1.34628	0.00204597	0.0856591	2.71	3.48	1.34	2.43	RP11-54O7.18	chr1	lincRNA	--
ENSG00000267724.1	2.25842	-1.46142	9.99266e-05	0.0148055	0.03	0.05	0.14	0.23	RP11-49K24.8	chr18	antisense	--
ENSG00000184923.12	-1.84801	-1.75062	0.00437312	0.132242	0.08	0.04	0	0.03	NUTM2A	chr10	protein_coding	NUT family member 2A
ENSG00000112182.14	1.40822	-1.01362	0.00171756	0.0811649	0.02	0.03	0.06	0.05	BACH2	chr6	protein_coding	BTB and CNC homology 1, basic leucine zipper transcription factor 2
ENSG00000224616.1	-1.88993	-1.92003	0.00748163	0.182001	0.66	0.61	0.32	0	RTCA-AS1	chr1	antisense	RTCA antisense RNA 1
ENSG00000215388.3	1.2477	-0.730973	0.00171889	0.0811649	0.18	0.31	0.46	0.63	ACTG1P3	chr20	processed_pseudogene	actin gamma 1 pseudogene 3
ENSG00000256713.7	-5.05207	-2.92042	0.00810984	0.182001	0.1	0	0	0	PGA5	chr11	protein_coding	pepsinogen 5, group I (pepsinogen A)
ENSG00000248367.1	0.823611	-0.0499923	0.006927	0.174834	1.14	1.67	2.56	2.17	CTB-129O4.1	chr5	antisense	--
ENSG00000162897.14	-5.05236	-2.92027	0.00810984	0.182001	0.04	0.04	0	0	FCAMR	chr1	protein_coding	Fc receptor, IgA, IgM, high affinity
ENSG00000273253.2	3.39236	-2.46054	0.00200016	0.0856591	0	0.03	0.35	0	RP3-402G11.26	chr22	antisense	--
ENSG00000230731.2	-2.7245	-1.92029	0.000339564	0.0300337	0.11	0.07	0.01	0.02	RP11-478K15.6	chr13	lincRNA	--
ENSG00000225930.3	6.33094	-2.11366	2.44785e-06	0.00114654	0	0	0.03	0.1	DKFZP434L187	chr15	lincRNA	--
ENSG00000270067.1	-1.15793	-0.875687	0.00727999	0.179619	0.63	1.07	0.28	0.42	CTC-487M23.5	chr5	antisense	--
ENSG00000236740.6	5.48381	-2.67258	0.0010506	0.0600581	0	0	0.04	0.05	RP11-411K7.1	chr6	lincRNA	--
ENSG00000135409.10	-1.42795	-1.1126	0.00283599	0.105048	0.21	0.32	0.1	0.08	AMHR2	chr12	protein_coding	anti-Mullerian hormone receptor, type II
ENSG00000279520.1	0.752122	1.88863	2.387e-05	0.00597573	1.86	1.57	2.49	2.99	RP11-20I23.2	chr16	TEC	--
ENSG00000164308.16	0.603947	1.88356	0.000622591	0.0431504	0.4	0.44	0.63	0.57	ERAP2	chr5	protein_coding	endoplasmic reticulum aminopeptidase 2
ENSG00000179954.14	-0.697481	0.672218	0.00362067	0.12271	0.35	0.29	0.18	0.19	SSC5D	chr19	protein_coding	scavenger receptor cysteine rich family, 5 domains
ENSG00000267769.1	2.05438	-1.59859	0.00068842	0.0457476	0.11	0.22	0.69	0.66	CTB-50L17.9	chr19	antisense	--
ENSG00000237007.4	-5.05265	-2.92012	0.00810984	0.182001	0	0.27	0	0	KRT18P52	chr2	processed_pseudogene	keratin 18 pseudogene 52
ENSG00000264539.1	2.30681	-2.16539	0.00491738	0.141808	0.98	0.5	5.24	2.27	MIR548AR	chr13	miRNA	microRNA 548ar
ENSG00000240457.3	6.01465	-2.33541	3.57556e-05	0.00787838	0	0	0.93	0.53	RN7SL472P	chr14	misc_RNA	RNA, 7SL, cytoplasmic 472, pseudogene
ENSG00000146090.15	1.89251	-0.59883	1.91864e-06	0.000969383	0.09	0.06	0.28	0.26	RASGEF1C	chr5	protein_coding	RasGEF domain family, member 1C
ENSG00000259384.6	-8.7532	-0.0737209	1.00168e-29	3.23207e-26	1.74	1.94	0	0	GH1	chr17	protein_coding	growth hormone 1
ENSG00000247092.6	0.710956	0.847273	0.00269275	0.10182	0.68	0.78	1.08	1.18	SNHG10	chr14	antisense	small nucleolar RNA host gene 10
ENSG00000139737.21	-5.05207	-2.92042	0.00810984	0.182001	0.06	0	0	0	SLAIN1	chr13	protein_coding	SLAIN motif family, member 1
ENSG00000249839.1	1.45223	-0.899044	0.00072566	0.0471436	0.05	0.08	0.08	0.26	AC011330.5	chr15	unprocessed_pseudogene	--
ENSG00000259256.1	1.7411	-1.33508	0.000922079	0.0556698	0.21	0.42	1.48	0.58	RP11-838N2.3	chr18	lincRNA	--
ENSG00000188219.14	0.750585	0.44449	0.00431269	0.132198	0.21	0.19	0.21	0.42	POTEE	chr2	protein_coding	POTE ankyrin domain family, member E
ENSG00000214967.5	0.626925	1.48369	0.00149881	0.0744686	1.03	1.71	1.65	2.35	NPIPA7	chr16	protein_coding	nuclear pore complex interacting protein family, member A7
ENSG00000231140.3	-5.05258	-2.92016	0.00810984	0.182001	0.03	0.19	0	0	RP11-347J14.7	chr9	lincRNA	--
ENSG00000247950.6	2.16002	-1.52822	0.000264556	0.0256926	0	0.07	0.14	0.15	SEC24B-AS1	chr4	antisense	SEC24B antisense RNA 1
ENSG00000226055.2	5.20084	-2.83333	0.00409817	0.126877	0	0	0	0.19	PAICSP1	chr9	processed_pseudogene	phosphoribosylaminoimidazole carboxylase, phosphoribosylaminoimidazole succinocarboxamide synthetase pseudogene 1
ENSG00000274735.1	2.83594	-2.22066	0.00148228	0.0740885	0.5	0.51	0	7.38	FP236383.3	chr21	miRNA	--
ENSG00000173110.7	5.19677	4.74252	4.90432e-222	7.12107e-218	0.47	0.54	13.46	21.81	HSPA6	chr1	protein_coding	heat shock 70kDa protein 6 (HSP70B')
ENSG00000072818.11	0.978523	-0.220081	0.0026636	0.101112	0.17	0.15	0.32	0.27	ACAP1	chr17	protein_coding	ArfGAP with coiled-coil, ankyrin repeat and PH domains 1
ENSG00000265778.2	5.03649	-2.92044	0.00810984	0.182001	0	0	0.09	0.09	RP11-17M16.2	chr18	antisense	--
ENSG00000273568.1	1.10786	0.259383	7.02664e-05	0.011795	1.96	2.29	4.73	3.96	RP11-417L19.6	chr12	sense_intronic	--
ENSG00000279953.1	1.11067	-0.750758	0.00530562	0.149733	0.1	0.3	0.34	0.47	RP11-338K17.5	chr12	TEC	--
ENSG00000085465.12	0.718908	1.75073	9.54025e-05	0.014495	1	0.89	1.36	1.59	OVGP1	chr1	protein_coding	oviductal glycoprotein 1, 120kDa
ENSG00000231842.1	-5.93893	-2.39658	7.01219e-05	0.011795	0.29	0.44	0	0	RP11-527F13.1	chr6	lincRNA	--
ENSG00000138675.16	1.99966	-1.63466	0.00110237	0.06079	0.03	0.01	0.1	0.02	FGF5	chr4	protein_coding	fibroblast growth factor 5
ENSG00000212371.1	2.06693	-1.79152	0.00181611	0.082406	0.37	0.56	1.24	2.53	SNORA46	chr14	snoRNA	small nucleolar RNA, H/ACA box 46
ENSG00000260743.1	1.46835	-1.16524	0.00222892	0.0901504	0.14	0.07	0.42	0.17	RP11-255C15.3	chr3	lincRNA	--
ENSG00000267855.5	-2.57283	-2.39676	0.00795712	0.182001	0.51	0.09	0.09	0	NDUFA7	chr19	protein_coding	NADH dehydrogenase (ubiquinone) 1 alpha subcomplex, 7, 14.5kDa
ENSG00000231483.1	-1.26468	-1.03715	0.00608945	0.162984	0.82	0.84	0.53	0.13	RP11-336A10.5	chr10	lincRNA	--
ENSG00000230439.2	-0.586654	1.15102	0.00544894	0.152151	1.44	1.2	0.75	0.91	RP11-488P3.1	chr1	sense_intronic	--
ENSG00000264635.1	2.68538	-0.398177	3.66119e-11	5.31605e-08	0.1	0.09	0.42	0.77	RP11-769O8.3	chr18	sense_intronic	--
ENSG00000269653.1	3.68436	-1.63552	7.30807e-07	0.000451545	0	0.03	0.14	0.26	CTB-102L5.7	chr19	sense_intronic	--
ENSG00000212864.3	-0.587909	2.41108	0.00020336	0.0231591	4.2	5.16	2.6	3.28	RNF208	chr9	protein_coding	ring finger protein 208
ENSG00000272914.1	-5.93907	-2.3965	7.01219e-05	0.011795	0.07	0.2	0	0	RP11-330O11.3	chr10	sense_intronic	--
ENSG00000261468.1	-0.921701	-0.233375	0.00644038	0.168494	0.34	0.58	0.21	0.24	RP11-1024P17.1	chr3	sense_overlapping	--
ENSG00000277739.1	-4.72695	0.551364	2.26073e-35	8.20645e-32	0	30.39	1.06	0	RNA5-8S5	chr21	rRNA	RNA, 5.8S ribosomal 5
ENSG00000143333.6	-3.42061	-2.4607	0.00200016	0.0856591	0.06	0.09	0.01	0	RGS16	chr1	protein_coding	regulator of G-protein signaling 16
ENSG00000259635.1	2.64714	-2.33571	0.00457034	0.135487	0	0.04	0.07	0.16	AC100830.3	chr15	antisense	--
ENSG00000049249.8	-0.629571	1.08005	0.00342523	0.117994	0.34	0.37	0.21	0.23	TNFRSF9	chr1	protein_coding	tumor necrosis factor receptor superfamily, member 9
ENSG00000189283.9	1.13309	-0.942753	0.00854785	0.186639	0.06	0.19	0.34	0.19	FHIT	chr3	protein_coding	fragile histidine triad
ENSG00000274922.1	-0.605879	1.13539	0.00431555	0.132198	0.63	0.81	0.41	0.48	RP11-88E10.5	chr13	lincRNA	--
ENSG00000214875.2	2.23611	-1.92071	0.00181332	0.082406	0.05	0.15	0.33	0.59	MED28P1	chr10	processed_pseudogene	mediator complex subunit 28 pseudogene 1
ENSG00000043591.5	0.980697	0.462801	0.000198257	0.0229378	0.3	0.22	0.5	0.48	ADRB1	chr10	protein_coding	adrenoceptor beta 1
ENSG00000267338.1	1.93186	-1.8762	0.00469926	0.13834	0.26	0	0.5	0.47	KB-7G2.9	chr22	lincRNA	--
ENSG00000197444.9	1.54666	-1.22029	0.00171057	0.0811649	0.02	0.06	0.09	0.14	OGDHL	chr10	protein_coding	oxoglutarate dehydrogenase-like
ENSG00000223764.2	1.25189	-0.321041	0.000252309	0.0256926	0.24	0.29	0.53	0.67	RP11-54O7.3	chr1	lincRNA	--
ENSG00000229036.7	-1.28163	-1.11321	0.00711547	0.177	0.23	0.15	0.03	0.11	VDAC1P8	chr6	transcribed_processed_pseudogene	voltage-dependent anion channel 1 pseudogene 8
ENSG00000274827.4	1.81573	-1.75077	0.00437312	0.132242	0.03	0.01	0.06	0.08	LINC01297	chr14	lincRNA	long intergenic non-protein coding RNA 1297
ENSG00000259803.6	-1.45585	-0.616483	0.000219624	0.0241586	0.47	0.19	0.13	0.09	SLC22A31	chr16	protein_coding	solute carrier family 22, member 31
ENSG00000279035.1	-5.21741	-2.83281	0.00409817	0.126877	0.06	0.05	0	0	RP11-649A18.3	chr17	TEC	--
ENSG00000154537.4	-1.02183	1.07448	3.86614e-06	0.0016039	4.42	3.15	1.9	1.64	FAM27C	chr9	lincRNA	family with sequence similarity 27, member C
ENSG00000269997.1	1.16991	-0.920749	0.00620032	0.164286	0.56	0.31	0.88	0.98	RP11-214K3.21	chr12	sense_intronic	--
ENSG00000272902.2	0.660016	1.59783	0.00056511	0.0409989	0.74	0.84	0.99	1.37	RP11-299H21.1	chr2	lincRNA	--
ENSG00000124602.9	-1.21706	-0.769949	0.00329894	0.115423	0.14	0.25	0.1	0.06	UNC5CL	chr6	protein_coding	unc-5 homolog C (C. elegans)-like
ENSG00000260879.1	-0.860608	0.752552	0.000429437	0.0348348	1.36	0.91	0.69	0.5	RP11-483I13.5	chr1	antisense	--
ENSG00000088881.20	-5.21719	-2.83292	0.00409817	0.126877	0.07	0.01	0	0	EBF4	chr20	protein_coding	early B-cell factor 4
ENSG00000278153.1	-3.52519	-2.39676	0.00108371	0.0606247	0.75	0.21	0.07	0	RP4-585I14.3	chr20	lincRNA	--
ENSG00000251733.1	1.64361	-1.39745	0.00213567	0.0873517	0.43	1.52	1.45	4.34	SCARNA8	chr9	scaRNA	small Cajal body-specific RNA 8
ENSG00000215288.4	-5.36549	-2.75036	0.00207364	0.0856591	0.14	0.09	0	0	RP11-613H2.1	chr8	processed_pseudogene	--
ENSG00000267270.5	1.59802	-1.563	0.00546884	0.152176	0.05	0.02	0.09	0.08	PARD6G-AS1	chr18	antisense	PARD6G antisense RNA 1
ENSG00000254859.1	-3.30721	-2.52792	0.00367993	0.12271	0.39	0.29	0.05	0	RP11-661A12.5	chr8	antisense	--
ENSG00000250731.1	1.8583	-1.39694	0.000640276	0.043647	0.08	0.23	0.55	0.52	TPM3P6	chr19	processed_pseudogene	tropomyosin 3 pseudogene 6
ENSG00000274363.1	-1.07203	-0.671643	0.00705118	0.177	0.53	1.23	0.51	0.28	RP11-104O19.4	chr17	lincRNA	--
ENSG00000261326.2	0.6606	2.60259	1.54403e-05	0.00419054	0.65	0.81	1.1	1.08	LINC01355	chr1	lincRNA	long intergenic non-protein coding RNA 1355
ENSG00000275209.1	3.39886	-1.08653	2.3329e-09	2.82281e-06	0	2.33	22.16	2.64	FP236383.4	chr21	miRNA	--
ENSG00000260934.1	-5.36535	-2.75043	0.00207364	0.0856591	0.44	0.11	0	0	CTA-363E6.7	chr16	antisense	--
ENSG00000272622.1	1.55373	-0.750623	0.000145736	0.0189784	0.24	0.54	1.12	1.06	RP11-395N3.2	chr2	lincRNA	--
ENSG00000231125.2	1.2413	0.0684607	3.34069e-05	0.00752043	0.46	0.79	1.64	1.17	AF129075.5	chr21	sense_intronic	--
ENSG00000184838.14	1.19171	-1.06273	0.00851815	0.186411	0.04	0.16	0.16	0.26	PRR16	chr5	protein_coding	proline rich 16
ENSG00000261064.1	1.42582	-1.19194	0.00325159	0.113904	0.19	0.19	0.78	0.2	RP11-1000B6.3	chr15	lincRNA	--
ENSG00000171951.4	-1.27612	-0.275943	0.000221907	0.0243176	0.32	0.4	0.15	0.13	SCG2	chr2	protein_coding	secretogranin II
ENSG00000224738.1	1.30855	-0.335507	0.000150504	0.0192539	0.19	0.34	0.67	0.58	AC099850.1	chr17	antisense	--
ENSG00000234617.1	3.9297	-2.11343	4.90202e-05	0.00961855	0	0.04	0.22	0.45	SNRK-AS1	chr3	antisense	SNRK antisense RNA 1
ENSG00000278274.1	0.855931	0.917892	0.000168827	0.0205638	9.72	7.24	13.78	15.31	SNORA61	chr1	snoRNA	small nucleolar RNA, H/ACA box 61
ENSG00000203864.3	-3.1846	-2.59834	0.00674452	0.172413	0.36	0.44	0	0.07	C1orf137	chr1	lincRNA	chromosome 1 open reading frame 137
ENSG00000130751.9	-1.41982	-0.510203	0.00017401	0.0208426	0.35	0.35	0.19	0.06	NPAS1	chr19	protein_coding	neuronal PAS domain protein 1
ENSG00000236393.1	-1.14953	-0.811602	0.00621007	0.164394	0.25	0.14	0.11	0.06	RP11-320G24.1	chrX	lincRNA	--
ENSG00000227354.6	-0.65146	0.702586	0.00769345	0.182001	0.38	0.67	0.32	0.31	RBM26-AS1	chr13	antisense	RBM26 antisense RNA 1
ENSG00000231873.1	-2.67851	-2.33515	0.00457034	0.135487	0.22	0.57	0.05	0.05	RP11-761N21.1	chr3	lincRNA	--
ENSG00000253183.1	3.49598	-2.39717	0.00108371	0.0606247	0.02	0	0.08	0.19	RP4-701O16.5	chr7	processed_pseudogene	--
ENSG00000263823.1	-2.14086	-1.56274	0.000427756	0.0348348	0.21	0.27	0	0.1	RP11-326K13.4	chr18	antisense	--
ENSG00000279130.1	-3.52541	-2.39665	0.00108371	0.0606247	0.49	0.37	0.06	0	RP11-278J6.4	chr5	TEC	--
ENSG00000163606.10	-1.42567	-1.42825	0.00917912	0.19629	0.14	0.05	0.06	0.01	CD200R1	chr3	protein_coding	CD200 receptor 1
ENSG00000146592.16	2.00081	-1.83322	0.00293082	0.106389	0.01	0.01	0.02	0.04	CREB5	chr7	protein_coding	cAMP responsive element binding protein 5
ENSG00000236810.5	-0.652075	0.794877	0.00598828	0.160511	1.65	1.59	1.24	0.72	TCEB3-AS1	chr1	antisense	TCEB3 antisense RNA 1
ENSG00000237378.2	5.03679	-2.92029	0.00810984	0.182001	0	0	0.08	0.03	RP11-473M10.3	chr13	lincRNA	--
ENSG00000258017.1	-2.28132	-1.67222	0.000417884	0.0348348	0.3	0.17	0.07	0.02	RP11-386G11.10	chr12	antisense	--
ENSG00000260179.1	-1.78101	-1.79099	0.00683229	0.173284	0.27	0.11	0.07	0.03	RP5-902P8.12	chr1	lincRNA	--
ENSG00000189134.3	-5.21719	-2.83292	0.00409817	0.126877	0.14	0.02	0	0	NKAPL	chr6	protein_coding	NFKB activating protein-like
ENSG00000038427.15	-5.05236	-2.92027	0.00810984	0.182001	0.01	0.01	0	0	VCAN	chr5	protein_coding	versican
ENSG00000280046.1	0.877506	1.79269	1.60337e-06	0.000843077	0.26	0.31	0.46	0.53	RP11-1099M24.6	chr17	TEC	--
ENSG00000165757.8	-0.688756	1.84824	0.000125479	0.017352	0.4	0.4	0.22	0.25	KIAA1462	chr10	protein_coding	KIAA1462
ENSG00000273980.1	-1.79208	-1.46103	0.00153642	0.0755187	1.17	0.77	0.07	0.44	RP13-49I15.6	chr10	lincRNA	--
ENSG00000233723.7	2.21497	-2.21994	0.0082457	0.182234	0.01	0.01	0.06	0.04	LINC01122	chr2	lincRNA	long intergenic non-protein coding RNA 1122
ENSG00000276823.1	2.64744	-2.3357	0.00457034	0.135487	0.17	0	0.42	0.71	Metazoa_SRP	chrX	misc_RNA	--
ENSG00000118513.18	-0.831383	0.497872	0.00136246	0.0694135	0.33	0.31	0.17	0.17	MYB	chr6	protein_coding	v-myb avian myeloblastosis viral oncogene homolog
ENSG00000251179.1	1.93186	-1.87591	0.00469926	0.13834	0.04	0.15	0.43	0.28	TMEM92-AS1	chr17	antisense	TMEM92 antisense RNA 1
ENSG00000280291.1	3.15497	-2.5987	0.00674452	0.172413	0	0.01	0.03	0.07	RP11-759A24.2	chr15	TEC	--
ENSG00000261459.1	-0.61398	1.59191	0.00122361	0.0646066	2.02	2	1.24	1.25	AC002310.11	chr16	protein_coding	--
ENSG00000275558.1	-2.67836	-2.33523	0.00457034	0.135487	0.58	0.79	0.09	0.09	RN7SKP175	chr8	misc_RNA	RNA, 7SK small nuclear pseudogene 175
ENSG00000236493.2	1.85777	-1.92074	0.00748163	0.182001	0	0.14	0.14	0.36	EIF2S2P3	chr10	processed_pseudogene	eukaryotic translation initiation factor 2, subunit 2 beta pseudogene 3
ENSG00000201432.1	3.27759	-2.52844	0.00367993	0.12271	0	0.25	0.48	2.31	Y_RNA	chr7	misc_RNA	--
ENSG00000260648.3	-2.26854	-1.92	0.00181332	0.082406	0.03	0.11	0.01	0.01	RP11-133K1.7	chr15	sense_intronic	--
ENSG00000124713.5	1.54496	-1.33573	0.00286232	0.105594	0.13	0.13	0.33	0.41	GNMT	chr6	protein_coding	glycine N-methyltransferase
ENSG00000273759.1	0.893969	0.942309	0.000100835	0.0148642	1.62	1.64	2.25	3.47	RP4-563E14.1	chr20	lincRNA	--
ENSG00000259746.1	1.43719	-0.751004	0.0003967	0.0336847	0.91	0.65	1.76	2.26	HSPE1P3	chr15	processed_pseudogene	heat shock 10kDa protein 1 pseudogene 3
ENSG00000235531.9	-3.30742	-2.52781	0.00367993	0.12271	0.02	0.04	0	0	MSC-AS1	chr8	antisense	MSC antisense RNA 1
ENSG00000183914.14	-2.24596	-2.21999	0.0082457	0.182234	0.02	0.01	0	0	DNAH2	chr17	protein_coding	dynein, axonemal, heavy chain 2
ENSG00000187045.16	-1.37855	-0.477484	0.000217133	0.0241586	0.33	0.1	0.09	0.07	TMPRSS6	chr22	protein_coding	transmembrane protease, serine 6
ENSG00000176387.6	-0.661628	2.33919	3.60821e-05	0.00787838	2.98	2.51	1.41	1.86	HSD11B2	chr16	protein_coding	hydroxysteroid (11-beta) dehydrogenase 2
ENSG00000259422.1	-3.18408	-2.59844	0.00674452	0.172413	0.12	0.01	0.01	0	RP11-593F23.1	chr15	antisense	--
ENSG00000277966.1	-1.66903	-0.164628	9.00731e-07	0.000533821	3.98	5.26	1.63	1.11	HOXA11-AS1_4	chr7	misc_RNA	--
ENSG00000278639.1	1.7072	-1.4945	0.00236042	0.0930076	1.05	1.78	3.39	5.49	AL136221.3	chr13	miRNA	--
ENSG00000232373.2	5.60733	-2.59825	0.000532974	0.0396861	0	0	0.24	0.05	MTCYBP3	chr13	processed_pseudogene	MT-CYB pseudogene 3
ENSG00000047457.13	-0.703394	1.45554	0.000329269	0.0294215	0.66	0.55	0.41	0.3	CP	chr3	protein_coding	ceruloplasmin (ferroxidase)
ENSG00000233984.1	-5.36542	-2.7504	0.00207364	0.0856591	0.55	0.24	0	0	RPSAP14	chrX	processed_pseudogene	ribosomal protein SA pseudogene 14
ENSG00000212124.2	0.926465	-0.382533	0.00921542	0.196613	0.7	0.11	0.46	1.01	TAS2R19	chr12	protein_coding	taste receptor, type 2, member 19
ENSG00000277007.1	0.752691	0.603094	0.0033883	0.117278	0.24	0.47	0.56	0.56	RP11-392O17.2	chr1	lincRNA	--
ENSG00000237766.2	-2.3377	-1.63487	0.000253607	0.0256926	0.4	0.25	0.05	0.07	GGTA2P	chr12	processed_pseudogene	glycoprotein, alpha-galactosyltransferase 2, pseudogene
ENSG00000251411.1	-3.32105	-1.92021	4.60917e-05	0.00936387	0.33	0.23	0.02	0.02	RP11-397E7.4	chr4	processed_pseudogene	--
ENSG00000128254.12	-3.30736	-2.52799	0.00367993	0.12271	0.16	0.11	0	0.02	C22orf24	chr22	processed_transcript	chromosome 22 open reading frame 24
ENSG00000270362.1	0.917034	0.786498	0.000111445	0.0159426	0.32	0.34	0.6	0.59	HMGN3-AS1	chr6	antisense	HMGN3 antisense RNA 1
ENSG00000197258.5	1.70814	-1.49424	0.00236042	0.0930076	0.09	0.03	0.22	0.17	EIF4BP6	chr7	processed_pseudogene	eukaryotic translation initiation factor 4B pseudogene 6
ENSG00000152822.13	1.44541	-1.3977	0.00626582	0.165064	0.03	0.01	0.02	0.09	GRM1	chr6	protein_coding	glutamate receptor, metabotropic 1
ENSG00000228408.5	5.2013	-2.8331	0.00409817	0.126877	0	0	0.06	0.11	RP1-111D6.3	chr6	lincRNA	--
ENSG00000235257.8	-3.42077	-2.46078	0.00200016	0.0856591	0.04	0.06	0	0.01	ITGA9-AS1	chr3	processed_transcript	ITGA9 antisense RNA 1
ENSG00000123610.4	-1.42956	-0.635077	0.000312463	0.0283299	0.55	0.46	0.08	0.27	TNFAIP6	chr2	protein_coding	tumor necrosis factor, alpha-induced protein 6
ENSG00000120149.8	0.640889	1.49148	0.00113445	0.0620422	0.73	0.88	0.89	1.48	MSX2	chr5	protein_coding	msh homeobox 2
ENSG00000253764.1	0.846205	-0.00255708	0.00599153	0.160511	0.73	0.67	0.84	1.54	RP11-439C15.4	chr8	lincRNA	--
ENSG00000261949.5	5.0371	-2.92014	0.00810984	0.182001	0	0	0.12	0	GFY	chr19	protein_coding	golgi-associated, olfactory signaling regulator
ENSG00000226652.3	-0.677843	0.774466	0.0045475	0.135487	1.32	1.86	1.2	0.69	PSMD10P2	chr3	transcribed_processed_pseudogene	proteasome 26S subunit, non-ATPase, 10 pseudogene 2
ENSG00000256091.1	1.61901	-0.876307	0.000175886	0.0209334	0.45	0.13	0.92	0.8	MTRF1LP1	chr11	processed_pseudogene	mitochondrial translational release factor 1-like pseudogene 1
ENSG00000279722.1	-3.13464	-1.635	6.87891e-06	0.00243614	0.29	0.05	0.02	0.01	RP11-44F14.6	chr16	TEC	--
ENSG00000115956.9	-2.58139	-2.01367	0.00100415	0.0592694	0.19	0	0.01	0.02	PLEK	chr2	protein_coding	pleckstrin
ENSG00000231105.1	-2.2238	-1.71077	0.000685443	0.0457476	0.12	0.15	0.01	0.04	RP5-1071N3.1	chr1	antisense	--
ENSG00000236804.1	5.20205	-2.83272	0.00409817	0.126877	0	0	0.29	0.03	RPS3AP12	chr1	processed_pseudogene	ribosomal protein S3a pseudogene 12
ENSG00000234969.1	5.60718	-2.59833	0.000532974	0.0396861	0	0	0.21	0.07	RP13-33H18.1	chrX	processed_pseudogene	--
ENSG00000229623.1	5.71911	-2.52859	0.000270728	0.0256926	0	0	0.04	0.49	METTL21AP1	chr21	processed_pseudogene	methyltransferase like 21A pseudogene 1
ENSG00000205426.10	-0.764122	0.482005	0.00333028	0.115966	0.6	0.89	0.59	0.24	KRT81	chr12	protein_coding	keratin 81, type II
ENSG00000230423.1	5.48306	-2.67296	0.0010506	0.0600581	0	0	0	0.85	XX-C2158C6.1	chr6	lincRNA	--
ENSG00000253106.1	0.901839	-0.396788	0.00921542	0.196613	0.18	0.17	0.36	0.26	RP11-158K1.3	chr8	antisense	--
ENSG00000270001.1	-2.16836	-1.36573	0.00010399	0.0152518	1.49	0.35	0.28	0.11	RP11-218C14.8	chr20	lincRNA	--
ENSG00000203489.3	5.20175	-2.83288	0.00409817	0.126877	0	0	0.19	0.09	HMGB1P39	chr6	processed_pseudogene	high mobility group box 1 pseudogene 39
ENSG00000281189.1	-1.44523	-0.319494	4.44569e-05	0.00928623	0.25	0.72	0.17	0.16	GHET1	chr7	lincRNA	gastric carcinoma proliferation enhancing transcript 1
ENSG00000273599.1	5.34915	-2.75077	0.00207364	0.0856591	0	0	0.01	0.04	RP11-59C5.3	chr10	antisense	--
ENSG00000167912.5	-0.783423	0.269558	0.00593723	0.159942	1.21	0.83	0.56	0.56	RP11-25K19.1	chr8	antisense	--
ENSG00000188611.14	0.620823	1.05054	0.00518524	0.147627	0.17	0.22	0.26	0.31	ASAH2	chr10	protein_coding	N-acylsphingosine amidohydrolase (non-lysosomal ceramidase) 2
ENSG00000261131.1	3.39229	-2.46065	0.00200016	0.0856591	0.09	0	1.01	0.08	RP11-93O14.2	chr16	sense_intronic	--
ENSG00000182175.13	-1.97224	-1.67227	0.00175568	0.0817064	0.02	0.03	0	0.01	RGMA	chr15	protein_coding	repulsive guidance molecule family member a
ENSG00000110876.9	-0.599736	0.880069	0.00934304	0.198268	0.92	0.54	0.39	0.52	SELPLG	chr12	protein_coding	selectin P ligand
ENSG00000258704.5	-1.04931	-0.037589	0.000881294	0.0544169	1.23	0.53	0.48	0.33	SRP54-AS1	chr14	processed_transcript	SRP54 antisense RNA 1 (head to head)
ENSG00000163359.15	-1.42738	-1.42873	0.00917912	0.19629	0.04	0.03	0	0.02	COL6A3	chr2	protein_coding	collagen, type VI, alpha 3
ENSG00000226321.5	-5.05207	-2.92042	0.00810984	0.182001	0.04	0	0	0	CROCC2	chr2	protein_coding	ciliary rootlet coiled-coil, rootletin family member 2
ENSG00000275468.1	-0.763846	1.43299	0.000109923	0.0158028	3.41	2.67	1.64	1.75	LLNLR-304A6.2	chr19	processed_pseudogene	--
ENSG00000216990.2	-5.62269	-2.59833	0.000532974	0.0396861	0.12	0.09	0	0	HSPD1P10	chr6	processed_pseudogene	heat shock 60kDa protein 1 (chaperonin) pseudogene 10
ENSG00000239775.1	-0.817257	0.288846	0.00290312	0.106389	1.98	1.57	0.69	1.2	AC017116.11	chr7	sense_overlapping	--
ENSG00000137960.5	5.03619	-2.9206	0.00810984	0.182001	0	0	0.01	0.04	GIPC2	chr1	protein_coding	GIPC PDZ domain containing family, member 2
ENSG00000167191.11	0.720697	0.852679	0.00177909	0.0820842	0.22	0.16	0.21	0.37	GPRC5B	chr16	protein_coding	G protein-coupled receptor, class C, group 5, member B
ENSG00000124614.13	0.599498	1.15072	0.00544894	0.152151	1.4	1.57	2.13	2.14	RPS10	chr6	protein_coding	ribosomal protein S10
ENSG00000204970.9	1.39605	-1.11311	0.00283599	0.105048	0.05	0.02	0.1	0.07	PCDHA1	chr5	protein_coding	protocadherin alpha 1
ENSG00000201944.1	2.08579	-2.01394	0.00491267	0.141808	0.21	0.65	0.82	2.74	SNORA72	chr1	snoRNA	small nucleolar RNA, H/ACA box 72
ENSG00000280308.1	0.871921	-0.166066	0.00611312	0.163316	1.57	1.07	2.1	2.48	FKSG61	chr14	protein_coding	--
ENSG00000273300.1	2.04465	-1.42889	0.000266483	0.0256926	0.26	0.2	0.83	1.03	AC000068.9	chr22	antisense	--
ENSG00000169067.3	-0.651755	0.664819	0.00823723	0.182234	0.61	0.52	0.34	0.34	ACTBL2	chr5	protein_coding	actin, beta-like 2
ENSG00000259081.1	5.824	-2.46152	0.000137694	0.0181756	0	0	0.03	0.35	RP11-488C13.6	chr14	antisense	--
ENSG00000271993.1	3.27849	-2.52799	0.00367993	0.12271	0	0.05	0.35	0.16	RP11-285J16.1	chr3	antisense	--
ENSG00000275437.1	1.05576	0.991947	3.65563e-06	0.00157989	0.25	0.32	0.57	0.57	RP5-908M14.10	chr20	sense_intronic	--
ENSG00000264019.1	3.39102	-2.46122	0.00200016	0.0856591	0	0.06	0.23	0.49	RP11-6N17.6	chr17	antisense	--
ENSG00000278986.1	1.00806	-0.691461	0.00942376	0.198453	0.13	0.23	0.38	0.29	RP11-723J4.3	chr18	TEC	--
ENSG00000241081.1	-1.72263	-0.920079	0.000128385	0.0175037	1.8	1.45	0.51	0.41	RP11-488C13.1	chr14	processed_pseudogene	--
ENSG00000103942.12	1.70785	-1.49453	0.00236042	0.0930076	0.11	0	0.16	0.19	HOMER2	chr15	protein_coding	homer scaffolding protein 2
ENSG00000203724.10	-1.01153	-0.0624176	0.00149266	0.0743512	1.96	1.5	0.65	0.97	C1orf53	chr1	protein_coding	chromosome 1 open reading frame 53
ENSG00000233776.5	1.85799	-1.92085	0.00748163	0.182001	0.17	0.12	0.28	0.74	LINC01251	chr9	antisense	long intergenic non-protein coding RNA 1251
ENSG00000221643.1	2.82276	-1.83315	0.000113057	0.0159824	0	0.68	2.17	2.69	SNORA77	chr1	snoRNA	small nucleolar RNA, H/ACA box 77
ENSG00000016082.14	1.21204	1.18681	2.22144e-08	2.38928e-05	0.38	0.55	0.88	1.14	ISL1	chr5	protein_coding	ISL LIM homeobox 1
ENSG00000279799.1	0.975164	-0.545769	0.00774292	0.182001	0.31	1.25	1.07	1.81	AC006077.3	chr5	TEC	--
ENSG00000268940.5	1.447	-1.39703	0.00626582	0.165064	0.19	0.02	0.31	0.25	CT45A1	chrX	protein_coding	cancer/testis antigen family 45, member A1
ENSG00000182873.5	1.04527	-0.791055	0.00972217	0.203556	0.16	0.16	0.38	0.27	RP11-181G12.2	chr1	antisense	--
ENSG00000230510.6	2.10832	-1.56319	0.000427756	0.0348348	0.07	0.02	0.17	0.21	PPP5D1	chr19	protein_coding	PPP5 tetratricopeptide repeat domain containing 1
ENSG00000261069.3	1.1364	-0.206493	0.000500611	0.0387673	0.36	0.32	0.72	0.71	RP11-701H24.4	chr15	lincRNA	--
ENSG00000130294.14	2.30526	-2.16626	0.00491738	0.141808	0.01	0	0	0.04	KIF1A	chr2	protein_coding	kinesin family member 1A
ENSG00000262558.1	-3.30728	-2.52788	0.00367993	0.12271	0.18	0.19	0.03	0	RP11-1260E13.3	chr17	antisense	--
ENSG00000138670.16	0.625608	3.08325	8.70255e-06	0.00293863	0.62	0.64	0.96	0.89	RASGEF1B	chr4	protein_coding	RasGEF domain family, member 1B
ENSG00000213979.3	-5.73566	-2.52806	0.000270728	0.0256926	0.38	0.07	0	0	RPL7AP14	chr20	processed_pseudogene	ribosomal protein L7a pseudogene 14
ENSG00000188322.4	-1.05808	0.356139	0.000108004	0.0156809	0.24	0.33	0.1	0.16	SBK1	chr16	protein_coding	SH3 domain binding kinase 1
ENSG00000206885.1	1.10066	-0.320588	0.00118768	0.063423	3.07	2.71	6.54	5.28	SNORA75	chr2	snoRNA	small nucleolar RNA, H/ACA box 75
ENSG00000243005.3	-3.52498	-2.39687	0.00108371	0.0606247	1.46	0	0.1	0	RN7SL16P	chr4	misc_RNA	RNA, 7SL, cytoplasmic 16, pseudogene
ENSG00000275215.1	-8.10312	-0.670567	6.14259e-20	1.48651e-16	0	12.68	0	0	RNA5-8S5	chr21	rRNA	RNA, 5.8S ribosomal 5
ENSG00000229299.2	-1.10472	-0.291167	0.00137194	0.0696523	2.9	0.86	0.88	0.78	RP4-583P15.10	chr20	antisense	--
ENSG00000240591.1	-3.71491	-2.27633	0.000315763	0.0283299	0.41	0.32	0.04	0	RP11-247I13.11	chr22	antisense	--
ENSG00000165071.14	2.92357	-2.16555	0.0008382	0.0523469	0.03	0	0.13	0.09	TMEM71	chr8	protein_coding	transmembrane protein 71
ENSG00000139410.14	-0.890277	0.710028	0.000268065	0.0256926	0.95	1.27	0.64	0.49	SDSL	chr12	protein_coding	serine dehydratase-like
ENSG00000198053.11	-1.26256	0.0222416	5.06827e-05	0.00986448	0.26	0.19	0.08	0.1	SIRPA	chr20	protein_coding	signal-regulatory protein alpha
ENSG00000082497.11	0.92423	0.427409	0.000506927	0.039152	0.16	0.13	0.22	0.29	SERTAD4	chr1	protein_coding	SERTA domain containing 4
ENSG00000175691.8	0.646782	2.22423	8.46021e-05	0.0134254	1.44	1.61	2.45	2.08	ZNF77	chr19	protein_coding	zinc finger protein 77
ENSG00000123096.11	-1.97238	-1.6722	0.00175568	0.0817064	0.05	0.09	0.01	0.02	SSPN	chr12	protein_coding	sarcospan
ENSG00000183889.12	-2.91834	0.262319	1.27815e-18	2.85518e-15	0.16	1.99	0.17	0.1	NPIPA5	chr16	protein_coding	nuclear pore complex interacting protein family, member A5
ENSG00000139572.3	-2.0333	-1.83277	0.00293082	0.106389	0.12	0.17	0.01	0.05	GPR84	chr12	protein_coding	G protein-coupled receptor 84
ENSG00000277399.4	-5.84089	-2.46081	0.000137694	0.0181756	0.03	0.02	0	0	GPR179	chr17	protein_coding	G protein-coupled receptor 179
ENSG00000230551.4	0.75978	5.53012	2.19037e-11	3.5338e-08	3.18	3.58	5.03	5.8	CTB-89H12.4	chr5	processed_transcript	--
ENSG00000105427.9	1.08598	-0.47858	0.00246885	0.0958708	0.79	0.38	0.72	1.63	CNFN	chr19	protein_coding	cornifelin
ENSG00000279921.1	1.05311	-0.397764	0.00325078	0.113904	0.81	1.2	1.21	2.71	AC017081.1	chr2	protein_coding	--
ENSG00000261662.1	-1.06337	-0.460273	0.00378363	0.125002	0.48	0.65	0.32	0.19	RP5-1042I8.7	chr1	sense_overlapping	--
ENSG00000280327.1	-1.22469	-0.126226	0.000180322	0.0212868	0.9	0.33	0.21	0.28	LA16c-313F4.1	chr16	TEC	--
ENSG00000230457.3	1.23376	-0.234539	0.000195267	0.0227733	0.21	0.46	0.6	0.9	PA2G4P4	chr3	processed_pseudogene	proliferation-associated 2G4 pseudogene 4
ENSG00000236527.1	2.22396	-1.306	3.99691e-05	0.00853459	0.21	0.16	0.83	0.88	ARF4P2	chr20	processed_pseudogene	ADP-ribosylation factor 4 pseudogene 2
ENSG00000275038.1	-0.872407	-0.074771	0.00634585	0.166621	0.4	0.3	0.18	0.19	RP11-546B8.6	chr5	protein_coding	--
ENSG00000258967.1	1.76422	-0.528163	4.08588e-06	0.00164797	0.56	1.05	2.9	2.33	HMGN1P3	chr14	processed_pseudogene	high mobility group nucleosome binding domain 1 pseudogene 3
ENSG00000168811.6	1.18922	0.0337075	8.11274e-05	0.0130886	0.35	0.3	0.8	0.61	IL12A	chr3	protein_coding	interleukin 12A
ENSG00000073670.13	-0.608325	1.3521	0.00246621	0.0958708	0.48	0.6	0.36	0.31	ADAM11	chr17	protein_coding	ADAM metallopeptidase domain 11
ENSG00000140403.12	0.72376	4.89251	6.47975e-10	8.18139e-07	4.74	4.52	6.91	7.57	DNAJA4	chr15	protein_coding	DnaJ (Hsp40) homolog, subfamily A, member 4
ENSG00000179477.9	-1.73207	-0.428593	3.69947e-06	0.00157989	0.48	0.23	0.08	0.12	ALOX12B	chr17	protein_coding	arachidonate 12-lipoxygenase, 12R type
ENSG00000256812.1	5.3496	-2.75054	0.00207364	0.0856591	0	0	0.13	0.13	CAPNS2	chr16	protein_coding	calpain, small subunit 2
ENSG00000277245.1	3.15595	-2.59829	0.00674452	0.172413	0.05	0	0.42	0.09	RP11-48G14.3	chr15	antisense	--
ENSG00000229828.2	5.03588	-2.92075	0.00810984	0.182001	0	0	0	0.13	PDE4DIPP1	chr1	unprocessed_pseudogene	phosphodiesterase 4D interacting protein pseudogene 1
ENSG00000204632.11	5.71941	-2.52844	0.000270728	0.0256926	0	0	0.05	0.16	HLA-G	chr6	protein_coding	major histocompatibility complex, class I, G
ENSG00000106588.10	-0.587565	1.99696	0.000638206	0.043647	2.45	2.95	1.9	1.51	PSMA2	chr7	protein_coding	proteasome (prosome, macropain) subunit, alpha type, 2
ENSG00000269906.1	0.797826	1.04947	0.000256712	0.0256926	2.4	1.32	2.52	3.6	RP11-248J18.2	chr14	sense_intronic	--
ENSG00000177418.2	4.00284	-2.06278	2.6284e-05	0.00625645	0	0.06	0.4	0.71	RP4-756H11.4	chr7	processed_pseudogene	--
ENSG00000259071.1	0.912532	-0.179456	0.00431294	0.132198	0.82	1.34	1.58	2.26	RP11-247L20.4	chr14	lincRNA	--
ENSG00000271851.1	0.869348	0.229421	0.00178075	0.0820842	0.28	0.28	0.56	0.41	RP11-565F19.2	chr17	sense_intronic	--
ENSG00000278991.1	0.844871	-0.0378135	0.00548522	0.152431	0.44	0.28	0.72	0.53	RP11-797A18.5	chr15	TEC	--
ENSG00000175489.9	2.47448	-2.06228	0.00171479	0.0811649	0.03	0	0.15	0.05	LRRC25	chr19	protein_coding	leucine rich repeat containing 25
ENSG00000259881.1	-0.777863	1.09675	0.000367832	0.0319816	1.07	0.67	0.53	0.43	RP11-830F9.5	chr16	antisense	--
ENSG00000205795.4	-2.44348	-1.56248	9.22678e-05	0.0141024	0.15	0.14	0.04	0.01	CYS1	chr2	protein_coding	cystin 1
ENSG00000124813.20	-0.848586	0.913197	0.000224022	0.0244572	0.32	0.24	0.18	0.12	RUNX2	chr6	protein_coding	runt-related transcription factor 2
ENSG00000184786.5	2.92261	-2.16596	0.0008382	0.0523469	0.04	0.04	0.14	0.44	TCTE3	chr6	protein_coding	t-complex-associated-testis-expressed 3
ENSG00000261000.1	-3.30707	-2.52814	0.00367993	0.12271	0.61	0.06	0	0.05	RP11-534L20.5	chr1	lincRNA	--
ENSG00000213549.3	-5.21741	-2.83281	0.00409817	0.126877	0.37	0.3	0	0	AC005077.8	chr7	processed_pseudogene	--
ENSG00000278233.1	-5.89933	1.66073	4.72624e-75	2.745e-71	0	68.43	1.06	0	RNA5-8S5	chr21	rRNA	RNA, 5.8S ribosomal 5
ENSG00000260669.2	-0.748932	1.15155	0.000404316	0.0342313	1.12	1.07	0.61	0.63	AL136419.6	chr14	processed_transcript	--
ENSG00000236830.6	-0.743673	0.90034	0.00125706	0.0656293	0.42	0.35	0.24	0.2	CBR3-AS1	chr21	processed_transcript	CBR3 antisense RNA 1
ENSG00000204257.14	-0.780746	0.580414	0.00200395	0.0856591	1.45	1.3	0.99	0.53	HLA-DMA	chr6	protein_coding	major histocompatibility complex, class II, DM alpha
ENSG00000198829.6	5.34945	-2.75061	0.00207364	0.0856591	0	0	0.03	0.04	SUCNR1	chr3	protein_coding	succinate receptor 1
ENSG00000243069.7	0.688638	0.686389	0.00582319	0.158635	0.28	0.43	0.48	0.6	ARHGEF26-AS1	chr3	processed_transcript	ARHGEF26 antisense RNA 1
ENSG00000279320.1	-2.57356	-2.39655	0.00795712	0.182001	0.04	0.14	0.01	0.01	RP11-329N15.3	chr3	TEC	--
ENSG00000279342.1	1.25794	0.840279	1.76971e-07	0.000148364	0.85	1.24	2.2	2.53	AP000866.1	chr11	protein_coding	--
ENSG00000205913.6	-0.606405	0.962473	0.00626948	0.165064	0.3	0.36	0.18	0.23	SRRM2-AS1	chr16	antisense	SRRM2 antisense RNA 1
ENSG00000121104.7	-5.05229	-2.92031	0.00810984	0.182001	0.06	0.03	0	0	FAM117A	chr17	protein_coding	family with sequence similarity 117, member A
ENSG00000278771.1	-0.907195	-0.125776	0.00527131	0.149345	3.85	2.48	1.73	1.47	Metazoa_SRP	chr14	misc_RNA	--
ENSG00000162511.7	-0.633434	1.09709	0.00307766	0.110068	0.95	0.99	0.62	0.56	LAPTM5	chr1	protein_coding	lysosomal protein transmembrane 5
ENSG00000213376.4	-2.22307	-1.71083	0.000685443	0.0457476	0.48	0.2	0.08	0.05	GAPDHP71	chr5	processed_pseudogene	glyceraldehyde-3-phosphate dehydrogenase pseudogene 71
ENSG00000183258.11	8.37477	13.4277	0	0	20.89	21.61	5424.88	7917.67	DDX41	chr5	protein_coding	DEAD (Asp-Glu-Ala-Asp) box polypeptide 41
ENSG00000273030.1	-1.57118	-1.59814	0.00823993	0.182234	0.75	0.64	0.33	0.11	RP11-285F16.1	chr10	lincRNA	--
ENSG00000010030.13	-2.24545	-2.22009	0.0082457	0.182234	0.18	0	0.01	0.02	ETV7	chr6	protein_coding	ets variant 7
ENSG00000232115.1	5.34885	-2.75092	0.00207364	0.0856591	0	0	0	0.57	RP11-123G9.1	chr10	processed_pseudogene	--
ENSG00000160161.9	-0.705326	0.374448	0.00882542	0.191547	0.29	0.33	0.15	0.2	CILP2	chr19	protein_coding	cartilage intermediate layer protein 2
ENSG00000224216.1	5.48381	-2.67258	0.0010506	0.0600581	0	0	0.08	0.09	RP13-228J13.1	chrX	antisense	--
ENSG00000272155.1	1.74146	-1.33511	0.000922079	0.0556698	0.38	0.19	1.4	0.46	RP11-707M3.3	chr8	antisense	--
ENSG00000197588.9	5.92206	-2.39729	7.01219e-05	0.011795	0	0	0.04	0.16	KLKP1	chr19	transcribed_unprocessed_pseudogene	kallikrein pseudogene 1
ENSG00000259744.1	1.49121	-0.792062	0.000308405	0.0282526	0.22	0.38	0.43	1.16	RP11-138H8.6	chr15	sense_intronic	--
ENSG00000267160.1	0.698825	0.365739	0.00829817	0.183053	0.26	0.36	0.62	0.33	RP11-1072C15.4	chr17	antisense	--
ENSG00000266495.1	-5.05236	-2.92027	0.00810984	0.182001	0.29	0.29	0	0	RP11-17J14.2	chr18	antisense	--
ENSG00000089505.17	0.707061	0.772773	0.0028501	0.105436	0.89	0.98	1.46	1.44	CMTM1	chr16	protein_coding	CKLF-like MARVEL transmembrane domain containing 1
ENSG00000186889.9	-0.910755	0.842056	0.000107346	0.015665	1.11	1.03	0.63	0.45	TMEM17	chr2	protein_coding	transmembrane protein 17
ENSG00000273335.1	-3.52599	-2.39636	0.00108371	0.0606247	0	0.68	0.05	0	RP11-61L19.2	chr18	lincRNA	--
ENSG00000211890.3	-0.724598	0.937449	0.00119534	0.063693	2.07	1.6	0.89	1.21	IGHA2	chr14	IG_C_gene	immunoglobulin heavy constant alpha 2 (A2m marker)
ENSG00000250629.1	-2.85377	-1.8329	0.000113057	0.0159824	0.94	0.2	0.1	0.05	RP11-122C5.3	chr5	antisense	--
ENSG00000231924.9	-0.590008	1.25432	0.00428371	0.131639	0.71	0.89	0.35	0.65	PSG1	chr19	protein_coding	pregnancy specific beta-1-glycoprotein 1
ENSG00000174403.15	2.543	-2.39683	0.00795712	0.182001	0.02	0	0.06	0.04	C20orf166-AS1	chr20	antisense	C20orf166 antisense RNA 1
ENSG00000231560.1	0.777464	0.833599	0.000834664	0.0523469	0.28	0.26	0.4	0.48	AC091814.3	chr12	lincRNA	--
ENSG00000157214.13	-2.67821	-2.33515	0.00457034	0.135487	0.02	0.03	0.01	0	STEAP2	chr7	protein_coding	STEAP family member 2, metalloreductase
ENSG00000281183.1	0.733305	2.51893	2.72347e-06	0.00125539	1.55	1.62	2.32	2.67	NPTN-IT1	chr15	sense_intronic	NPTN intronic transcript 1
ENSG00000164841.4	5.48336	-2.67281	0.0010506	0.0600581	0	0	0.03	0.13	TMEM74	chr8	protein_coding	transmembrane protein 74
ENSG00000149658.17	-1.48762	7.28642	1.94079e-41	9.39343e-38	57.14	61.62	19.49	20.6	YTHDF1	chr20	protein_coding	YTH N(6)-methyladenosine RNA binding protein 1
ENSG00000183960.8	5.35036	-2.75016	0.00207364	0.0856591	0	0	0.05	0	KCNH8	chr3	protein_coding	potassium channel, voltage gated eag related subfamily H, member 8
ENSG00000274925.1	0.698498	0.839779	0.00320293	0.113569	0.35	0.37	0.41	0.69	CTD-2547G23.4	chr16	lincRNA	--
ENSG00000276564.1	1.18667	-0.0874598	0.000158652	0.0197128	0.11	0.27	0.44	0.38	CTA-276F8.1	chr16	lincRNA	--
ENSG00000223652.2	6.01317	-2.33616	3.57556e-05	0.00787838	0	0	0	0.52	AC106786.1	chr5	antisense	--
ENSG00000262420.3	-1.9116	-1.71084	0.00277974	0.103758	0.12	0.13	0.01	0.05	RP11-490O6.2	chr16	antisense	--
ENSG00000177173.5	0.839555	0.521963	0.00110318	0.06079	0.75	0.69	1.17	1.27	NAP1L4P1	chr1	processed_pseudogene	nucleosome assembly protein 1-like 4 pseudogene 1
ENSG00000244731.7	-0.713128	1.05868	0.00123351	0.064813	0.31	0.47	0.3	0.16	C4A	chr6	protein_coding	complement component 4A (Rodgers blood group)
ENSG00000197653.14	-1.57901	-1.21958	0.00171057	0.0811649	0.04	0.03	0.01	0.01	DNAH10	chr12	protein_coding	dynein, axonemal, heavy chain 10
ENSG00000169213.6	-0.896003	0.626422	0.000257025	0.0256926	0.12	0.13	0.04	0.09	RAB3B	chr1	protein_coding	RAB3B, member RAS oncogene family
ENSG00000257512.1	-0.809867	0.0229104	0.00884617	0.191854	0.79	1.03	0.6	0.39	RP11-486A14.1	chr12	transcribed_processed_pseudogene	--
ENSG00000189433.5	-5.93886	-2.39661	7.01219e-05	0.011795	0.07	0.08	0	0	GJB4	chr1	protein_coding	gap junction protein, beta 4, 30.3kDa
ENSG00000224959.1	0.849665	0.355814	0.00142951	0.071925	0.54	1.13	1.51	1.35	AC017002.2	chr2	lincRNA	--
ENSG00000231431.7	1.24859	-1.11355	0.00711547	0.177	0.12	0.07	0.17	0.26	FAR2P4	chr2	transcribed_unprocessed_pseudogene	fatty acyl CoA reductase 2 pseudogene 4
ENSG00000260708.1	0.712068	1.16238	0.000809303	0.0515398	1.93	2.26	3.97	2.55	CTA-29F11.1	chr22	antisense	--
ENSG00000226849.1	1.95024	-1.33578	0.000261612	0.0256926	0.02	0.06	0.13	0.18	RP4-635E18.7	chr1	antisense	--
ENSG00000143001.4	-3.71499	-2.27645	0.000315763	0.0283299	0.26	0.16	0	0.02	TMEM61	chr1	protein_coding	transmembrane protein 61
ENSG00000232284.7	-1.52114	-1.49369	0.0071986	0.178368	0.07	0.17	0.04	0.03	GNG12-AS1	chr1	antisense	GNG12 antisense RNA 1
ENSG00000271888.1	-0.871071	1.02836	7.08508e-05	0.0118248	2.32	1.72	1.08	1.01	RP11-560J1.2	chr6	lincRNA	--
ENSG00000260296.1	1.66604	-1.67234	0.00614451	0.16382	0.15	0.02	0.38	0.16	RP11-395I6.3	chr4	sense_overlapping	--
ENSG00000270542.1	3.4971	-2.39653	0.00108371	0.0606247	0	0.15	1.74	0.28	RP11-311H10.7	chr9	processed_pseudogene	--
ENSG00000270894.1	3.27872	-2.52795	0.00367993	0.12271	0.07	0	0.58	0.18	AC015849.13	chr17	sense_overlapping	--
ENSG00000223614.4	0.930296	0.531373	0.000242717	0.0254459	0.27	0.4	0.75	0.46	ZNF735	chr7	protein_coding	zinc finger protein 735
ENSG00000241106.6	-1.13969	-0.411852	0.00158583	0.0772695	0.7	0.48	0.42	0.09	HLA-DOB	chr6	protein_coding	major histocompatibility complex, class II, DO beta
ENSG00000273703.1	1.88047	-1.71052	0.00277974	0.103758	0.22	0.22	1.35	0.27	HIST1H2BM	chr6	protein_coding	histone cluster 1, H2bm
ENSG00000233397.1	5.34885	-2.75092	0.00207364	0.0856591	0	0	0	0.42	AC008063.3	chr2	lincRNA	--
ENSG00000201129.1	1.16969	-0.920506	0.00620032	0.164286	1.24	2.31	3.79	3.8	SNORA58	chr1	snoRNA	small nucleolar RNA, H/ACA box 58
ENSG00000227730.2	-5.05214	-2.92038	0.00810984	0.182001	0.38	0.06	0	0	MTND6P5	chr9	unprocessed_pseudogene	MT-ND6 pseudogene 5
ENSG00000241511.1	-5.36557	-2.75032	0.00207364	0.0856591	0.35	0.36	0	0	RPS15AP24	chr8	processed_pseudogene	ribosomal protein S15a pseudogene 24
ENSG00000261556.8	0.929982	0.555059	0.00026923	0.0256926	0.25	0.31	0.52	0.49	SMG1P7	chr16	transcribed_unprocessed_pseudogene	SMG1 pseudogene 7
ENSG00000272145.1	0.702507	1.27947	0.000710861	0.0465991	0.6	1.22	1.46	1.33	NFYC-AS1	chr1	antisense	NFYC antisense RNA 1
ENSG00000280095.1	1.62699	-1.0624	0.000467247	0.0371558	0.35	0.36	1.25	0.87	CH507-42P11.7	chr21	lincRNA	--
ENSG00000223458.2	-3.18438	-2.59845	0.00674452	0.172413	0.7	0.27	0	0.08	LMO7DN-IT1	chr13	sense_intronic	LMO7DN intronic transcript 1
ENSG00000149656.8	5.60733	-2.59825	0.000532974	0.0396861	0	0	0.19	0.04	LINC00266-1	chr20	lincRNA	long intergenic non-protein coding RNA 266-1
ENSG00000263271.1	-1.63376	-1.71081	0.00938088	0.198268	0.79	0.67	0.19	0.24	RP11-1055B8.8	chr17	antisense	--
ENSG00000262429.1	-5.21748	-2.83278	0.00409817	0.126877	0.24	0.3	0	0	RP5-1050D4.3	chr17	antisense	--
ENSG00000279526.1	-5.21778	-2.83263	0.00409817	0.126877	0	0.17	0	0	AC011239.2	chr2	TEC	--
ENSG00000277067.4	-7.66089	-1.06098	8.35654e-15	1.51671e-11	0	0.63	0	0	CH507-254M2.1	chr21	lincRNA	--
ENSG00000270147.1	2.30666	-2.16532	0.00491738	0.141808	0	0.15	0.53	0.23	RP11-646I6.6	chr4	lincRNA	--
ENSG00000214694.10	-0.764515	0.547854	0.00276825	0.103758	0.32	0.35	0.2	0.17	ARHGEF33	chr2	protein_coding	Rho guanine nucleotide exchange factor (GEF) 33
ENSG00000162746.14	-2.11777	-2.0132	0.00491267	0.141808	0.14	0.12	0.05	0	FCRLB	chr1	protein_coding	Fc receptor-like B
ENSG00000146950.12	1.8785	-1.7113	0.00277974	0.103758	0	0.02	0.03	0.05	SHROOM2	chrX	protein_coding	shroom family member 2
ENSG00000232450.1	1.03468	-0.563445	0.00514884	0.146879	0.6	0.31	0.76	1	RP4-730K3.3	chr1	transcribed_processed_pseudogene	--
ENSG00000273314.1	-0.589715	1.02911	0.00812658	0.182063	0.79	1.05	0.67	0.49	RP5-1136G13.2	chr7	antisense	--
ENSG00000226396.1	0.774169	0.794001	0.000873402	0.0541957	2.78	1.82	4.54	2.95	RP5-1056L3.3	chr1	processed_pseudogene	--
ENSG00000278200.1	2.30565	-1.87639	0.00109183	0.0606247	0.05	0.05	0.18	0.35	RP13-766D20.4	chr17	lincRNA	--
ENSG00000135517.6	-5.21712	-2.83296	0.00409817	0.126877	0.1	0	0	0	MIP	chr12	protein_coding	major intrinsic protein of lens fiber
ENSG00000272509.1	-1.73922	-1.49389	0.00236042	0.0930076	1.09	0.56	0.35	0.11	RP11-347C18.5	chr8	antisense	--
ENSG00000099337.4	-0.651273	0.701083	0.0073074	0.179836	0.34	0.22	0.12	0.22	KCNK6	chr19	protein_coding	potassium channel, two pore domain subfamily K, member 6
ENSG00000272250.1	2.21378	-2.22055	0.0082457	0.182234	0.11	0.06	0.05	0.7	RP11-346C20.4	chr16	lincRNA	--
ENSG00000279900.1	0.896772	-0.113328	0.00412318	0.127516	1.24	1.01	2.04	1.94	RP11-113K21.6	chr11	TEC	--
ENSG00000234477.1	-0.874811	0.269838	0.00170593	0.0811649	1.34	1.75	0.7	0.89	AC004231.2	chr17	antisense	--
ENSG00000188833.9	-2.03309	-1.83288	0.00293082	0.106389	0.15	0.12	0.01	0.05	ENTPD8	chr9	protein_coding	ectonucleoside triphosphate diphosphohydrolase 8
ENSG00000171450.5	-1.03816	-0.527773	0.00585689	0.158809	0.24	0.34	0.11	0.15	CDK5R2	chr2	protein_coding	cyclin-dependent kinase 5, regulatory subunit 2 (p39)
ENSG00000236137.1	-1.63403	-1.71052	0.00938088	0.198268	0.09	0.25	0.06	0.04	RP11-27K13.3	chr1	antisense	--
ENSG00000248729.1	2.30577	-2.16577	0.00491738	0.141808	0	0.15	0.23	0.49	RP11-531A21.3	chr5	processed_pseudogene	--
ENSG00000255776.1	5.2022	-2.83265	0.00409817	0.126877	0	0	0.27	0	RP11-436I9.3	chr12	processed_pseudogene	--
ENSG00000207313.1	1.3278	-0.898148	0.0018712	0.0838671	1.43	1.87	4.16	3.77	SNORA2B	chr12	snoRNA	small nucleolar RNA, H/ACA box 2B
ENSG00000240718.3	2.64744	-2.3357	0.00457034	0.135487	0.19	0	0.45	0.77	RN7SL851P	chr7	misc_RNA	RNA, 7SL, cytoplasmic 851, pseudogene
ENSG00000269246.1	-5.05221	-2.92034	0.00810984	0.182001	0.97	0.33	0	0	CTC-246B18.10	chr19	lincRNA	--
ENSG00000099998.17	-2.08627	-1.59795	0.00068842	0.0457476	0.11	0.18	0.05	0.01	GGT5	chr22	protein_coding	gamma-glutamyltransferase 5
ENSG00000175600.15	0.998178	-0.0503997	0.00114867	0.0623897	0.26	0.33	0.54	0.59	SUGCT	chr7	protein_coding	succinyl-CoA:glutarate-CoA transferase
ENSG00000241975.1	0.615393	0.807634	0.00742336	0.181896	3.71	3.41	5.89	4.47	TCEB1P19	chr1	processed_pseudogene	transcription elongation factor B (SIII), polypeptide 1 pseudogene 19
ENSG00000237357.2	5.201	-2.83326	0.00409817	0.126877	0	0	0.01	0.08	RP11-475I24.3	chr9	lincRNA	--
ENSG00000240520.5	-5.50029	-2.67211	0.0010506	0.0600581	0	0.35	0	0	UOX	chr1	unitary_pseudogene	urate oxidase, pseudogene
ENSG00000230581.2	1.72679	-1.6348	0.00399557	0.126877	0.13	0.05	0.41	0.16	ACTG1P14	chr9	processed_pseudogene	actin gamma 1 pseudogene 14
ENSG00000019186.9	-0.980899	0.744535	4.69232e-05	0.00939758	0.63	0.39	0.18	0.31	CYP24A1	chr20	protein_coding	cytochrome P450, family 24, subfamily A, polypeptide 1
ENSG00000261392.1	-5.62276	-2.5983	0.000532974	0.0396861	0.22	0.23	0	0	RP11-473I1.6	chr16	lincRNA	--
ENSG00000282057.1	0.926162	-0.381723	0.00710489	0.177	0.1	0.16	0.19	0.27	RP4-621F18.2	chr1	lincRNA	--
ENSG00000172746.6	-5.05207	-2.92042	0.00810984	0.182001	0.45	0	0	0	RP11-344H11.4	chr1	unprocessed_pseudogene	--
ENSG00000141837.18	-1.62426	-1.30575	0.00191701	0.0853833	0.06	0.03	0.01	0.02	CACNA1A	chr19	protein_coding	calcium channel, voltage-dependent, P/Q type, alpha 1A subunit
ENSG00000156042.17	-0.871004	1.68736	3.14776e-06	0.00140632	0.94	0.91	0.42	0.53	CFAP70	chr10	protein_coding	cilia and flagella associated protein 70
ENSG00000183401.11	-0.590326	0.969059	0.0076452	0.182001	1.14	1.62	0.85	0.88	CCDC159	chr19	protein_coding	coiled-coil domain containing 159
ENSG00000277385.1	-5.05236	-2.92027	0.00810984	0.182001	0.43	0.44	0	0	Metazoa_SRP	chr22	misc_RNA	--
ENSG00000206897.1	1.72498	-1.22	0.00055755	0.040887	1.48	0.64	4.08	2.72	SNORA9	chr12	snoRNA	small nucleolar RNA, H/ACA box 9
ENSG00000260495.1	3.39109	-2.46126	0.00200016	0.0856591	0.01	0	0.04	0.09	RP11-55K13.1	chr16	antisense	--
ENSG00000151164.18	-1.42141	-0.334961	6.24436e-05	0.0113335	0.36	0.28	0.13	0.09	RAD9B	chr12	protein_coding	RAD9 homolog B (S. pombe)
ENSG00000249388.1	-2.77617	-2.27619	0.00260952	0.09958	0.27	0.54	0.1	0	RP11-834C11.6	chr12	lincRNA	--
ENSG00000142319.17	-0.878509	-0.220443	0.00905589	0.195236	0.3	0.14	0.07	0.16	SLC6A3	chr5	protein_coding	solute carrier family 6 (neurotransmitter transporter), member 3
ENSG00000213013.4	-5.05214	-2.92038	0.00810984	0.182001	0.51	0.07	0	0	RPS15AP36	chr19	processed_pseudogene	ribosomal protein S15a pseudogene 36
ENSG00000231154.1	0.940242	-0.0135334	0.0018743	0.0838671	0.16	0.36	0.48	0.46	MORF4L2-AS1	chrX	antisense	MORF4L2 antisense RNA 1
ENSG00000184486.8	0.92167	-0.0254894	0.00240745	0.0943487	0.1	0.12	0.23	0.17	POU3F2	chr6	protein_coding	POU class 3 homeobox 2
ENSG00000138622.3	-5.05243	-2.92023	0.00810984	0.182001	0.01	0.02	0	0	HCN4	chr15	protein_coding	hyperpolarization activated cyclic nucleotide gated potassium channel 4
ENSG00000219085.1	3.15512	-2.59863	0.00674452	0.172413	0	0.03	0.12	0.21	NPM1P37	chr6	processed_pseudogene	nucleophosmin 1 (nucleolar phosphoprotein B23, numatrin) pseudogene 37
ENSG00000272379.1	-2.12366	-1.39669	0.000166805	0.0204389	1.13	0.72	0.17	0.22	RP1-257A7.5	chr6	lincRNA	--
ENSG00000275332.1	5.0371	-2.92014	0.00810984	0.182001	0	0	0.5	0	CTD-2017F17.1	chr15	antisense	--
ENSG00000231317.1	5.0371	-2.92014	0.00810984	0.182001	0	0	0.11	0	RP11-310H4.6	chr7	unprocessed_pseudogene	--
ENSG00000168961.16	-1.65914	-1.06237	0.000467247	0.0371558	0.19	0.16	0.03	0.07	LGALS9	chr17	protein_coding	lectin, galactoside-binding, soluble, 9
ENSG00000280247.1	-5.05265	-2.92012	0.00810984	0.182001	0	0.22	0	0	AC005578.3	chr19	TEC	--
ENSG00000117114.19	-0.985334	-0.365544	0.00545474	0.152167	0.12	0.12	0.05	0.06	ADGRL2	chr1	protein_coding	adhesion G protein-coupled receptor L2
ENSG00000238268.2	-0.80071	0.0802276	0.00828113	0.182878	1.6	1.54	1.03	0.68	RP11-229P13.19	chr9	lincRNA	--
ENSG00000272831.1	-0.889116	-0.099863	0.00579398	0.158136	2.02	1.43	1.02	0.74	RP11-792A8.4	chr7	antisense	--
ENSG00000244945.1	2.06803	-1.79089	0.00181611	0.082406	0.01	0.06	0.21	0.09	RP11-1379J22.2	chr5	antisense	--
ENSG00000268471.4	0.738925	1.74506	5.51227e-05	0.0105054	0.55	0.85	1.19	1.03	DKFZP434I0714	chr4	lincRNA	--
ENSG00000174137.12	-1.20928	0.454924	5.87709e-06	0.00216039	0.46	0.46	0.14	0.23	FAM53A	chr4	protein_coding	family with sequence similarity 53, member A
ENSG00000090382.6	-5.05258	-2.92016	0.00810984	0.182001	0.02	0.11	0	0	LYZ	chr12	protein_coding	lysozyme
ENSG00000176928.5	-6.34825	-2.11264	2.44785e-06	0.00114654	0.03	0.07	0	0	GCNT4	chr5	protein_coding	glucosaminyl (N-acetyl) transferase 4, core 2
ENSG00000238109.1	5.0371	-2.92014	0.00810984	0.182001	0	0	0.16	0	AC004893.10	chr7	processed_pseudogene	--
ENSG00000262251.1	0.835526	1.67426	9.16754e-06	0.00295958	1.87	1.56	2.61	3.18	RP11-199F11.2	chr17	sense_intronic	--
ENSG00000229273.1	-2.58209	-2.01316	0.00100415	0.0592694	0.43	0.75	0.12	0.06	RP11-104G3.2	chr9	processed_pseudogene	--
ENSG00000268520.1	1.81573	-1.75048	0.00437312	0.132242	0	0.36	0.63	0.6	CTD-2616J11.10	chr19	sense_intronic	--
ENSG00000239335.4	-1.30837	-0.854303	0.00229125	0.0912729	1.22	0.69	0.31	0.41	LLPH-AS1	chr12	antisense	LLPH antisense RNA 1 (head to head)
ENSG00000127252.5	5.20084	-2.83333	0.00409817	0.126877	0	0	0	0.22	HRASLS	chr3	protein_coding	HRAS-like suppressor
ENSG00000206675.1	5.92295	-2.39684	7.01219e-05	0.011795	0	0	2.28	1.45	RNU6-32P	chr4	snRNA	RNA, U6 small nuclear 32, pseudogene
ENSG00000281091.2	-0.932677	0.250039	0.00111803	0.0614146	3.22	2.22	1.65	1.06	RP13-349O20.2	chrX	lincRNA	--
ENSG00000254639.1	1.12357	-0.563657	0.0024694	0.0958708	0.69	0.31	0.79	1.27	CTD-2589M5.5	chr11	lincRNA	--
ENSG00000200913.1	1.09284	0.249539	9.195e-05	0.0141024	5.67	6.03	13.58	10.19	SNORD46	chr1	snoRNA	small nucleolar RNA, C/D box 46
ENSG00000259705.1	-0.760282	0.588184	0.0026163	0.099708	0.66	0.93	0.46	0.43	RP11-227D13.1	chr15	lincRNA	--
ENSG00000279712.1	5.60628	-2.59878	0.000532974	0.0396861	0	0	0.01	0.02	CTA-280A3.2	chr22	lincRNA	--
ENSG00000268108.1	5.60583	-2.59901	0.000532974	0.0396861	0	0	0	0.6	CTB-60B18.12	chr19	antisense	--
ENSG00000185905.3	2.30543	-1.87643	0.00109183	0.0606247	0.01	0.03	0.06	0.15	C16orf54	chr16	protein_coding	chromosome 16 open reading frame 54
ENSG00000230289.1	5.34885	-2.75092	0.00207364	0.0856591	0	0	0	0.55	RP11-334J6.6	chr9	antisense	--
ENSG00000180815.14	1.37941	-1.22047	0.00471615	0.13834	0.03	0.06	0.07	0.14	MAP3K15	chrX	protein_coding	mitogen-activated protein kinase kinase kinase 15
ENSG00000241420.3	3.15512	-2.59863	0.00674452	0.172413	0	0.1	0.37	0.62	RN7SL505P	chr7	misc_RNA	RNA, 7SL, cytoplasmic 505, pseudogene
ENSG00000259756.1	3.77233	-2.21988	0.000169948	0.0205638	0	0.05	0.52	0.27	RP11-625H11.2	chr15	antisense	--
ENSG00000222489.1	2.71671	-1.59871	2.77014e-05	0.0064875	0.19	0.58	2.38	2.62	SNORA79	chr14	snoRNA	small nucleolar RNA, H/ACA box 79
ENSG00000263786.1	1.1665	1.02756	2.71633e-07	0.000207585	1.37	1.51	3.26	2.88	RP11-649A18.4	chr17	sense_intronic	--
ENSG00000236780.5	-5.21712	-2.83296	0.00409817	0.126877	0.1	0	0	0	AC078941.1	chr2	lincRNA	--
ENSG00000257298.1	2.2167	0.742745	4.65431e-17	9.65438e-14	0.1	0.11	0.35	0.55	RP3-405J10.3	chr12	sense_intronic	--
ENSG00000230091.6	-1.81832	-1.30568	0.000601134	0.0421665	0.15	0.14	0.01	0.07	TMEM254-AS1	chr10	antisense	TMEM254 antisense RNA 1
ENSG00000071575.11	-1.12813	-0.580276	0.00333841	0.115966	0.16	0.15	0.07	0.07	TRIB2	chr2	protein_coding	tribbles pseudokinase 2
ENSG00000178404.9	0.825928	-0.193026	0.0098981	0.206198	0.17	0.3	0.31	0.48	CEP295NL	chr17	protein_coding	CEP295 N-terminal like
ENSG00000250247.1	-1.34399	-1.16537	0.00584759	0.158809	0.36	0.44	0.09	0.2	SEPHS2P1	chr5	processed_pseudogene	selenophosphate synthetase 2 pseudogene 1
ENSG00000240589.3	5.20145	-2.83303	0.00409817	0.126877	0	0	0.36	0.43	RN7SL258P	chr17	misc_RNA	RNA, 7SL, cytoplasmic 258, pseudogene
ENSG00000259673.5	1.00713	-0.634937	0.00802843	0.182001	0.05	0.06	0.12	0.09	IQCH-AS1	chr15	lincRNA	IQCH antisense RNA 1
ENSG00000234350.4	-5.21726	-2.83289	0.00409817	0.126877	0.07	0.02	0	0	AC007405.4	chr2	lincRNA	--
ENSG00000124253.10	-1.10248	0.0688376	0.00029956	0.0276166	0.29	0.24	0.14	0.1	PCK1	chr20	protein_coding	phosphoenolpyruvate carboxykinase 1 (soluble)
ENSG00000263567.1	-5.36542	-2.7504	0.00207364	0.0856591	0.39	0.17	0	0	RP11-805L22.3	chr17	lincRNA	--
ENSG00000239218.2	1.1879	0.0328128	0.000108535	0.0156809	0.47	0.28	0.68	0.94	RPS20P22	chr8	transcribed_processed_pseudogene	ribosomal protein S20 pseudogene 22
ENSG00000164674.15	0.641639	0.840622	0.00694533	0.175044	0.38	0.41	0.55	0.62	SYTL3	chr6	protein_coding	synaptotagmin-like 3
ENSG00000227825.4	0.791699	0.23921	0.00413226	0.12766	0.18	0.24	0.34	0.35	SLC9A7P1	chr12	transcribed_processed_pseudogene	solute carrier family 9, subfamily A (NHE7, cation proton antiporter 7), member 7 pseudogene 1
ENSG00000272542.1	5.03634	-2.92052	0.00810984	0.182001	0	0	0.08	0.13	RP11-255P5.2	chr13	lincRNA	--
ENSG00000222724.1	-5.21763	-2.8327	0.00409817	0.126877	0.29	1.03	0	0	RNU2-63P	chr2	snRNA	RNA, U2 small nuclear 63, pseudogene
ENSG00000280384.1	1.93105	-1.87654	0.00469926	0.13834	0.05	0.01	0.07	0.19	RP4-695O20.1	chr22	sense_intronic	--
ENSG00000226029.1	-0.937675	-0.349788	0.00789422	0.182001	0.12	0.38	0.12	0.13	RP4-798A10.2	chr1	lincRNA	--
ENSG00000168918.13	-1.27536	-0.545476	0.000813905	0.0516065	0.18	0.11	0.04	0.07	INPP5D	chr2	protein_coding	inositol polyphosphate-5-phosphatase, 145kDa
ENSG00000238741.1	0.762556	0.428016	0.00402181	0.126877	2.21	2.68	3.87	3.99	SCARNA7	chr3	scaRNA	small Cajal body-specific RNA 7
ENSG00000267312.1	-2.03322	-1.83266	0.00293082	0.106389	0.21	0.35	0.05	0.07	RP11-1094M14.7	chr17	processed_pseudogene	--
ENSG00000259577.1	-2.28206	-1.6723	0.000417884	0.0348348	0.16	0.18	0.01	0.05	RP11-430B1.2	chr15	lincRNA	--
ENSG00000235245.1	-0.692477	0.546924	0.00633039	0.166517	2.82	1.87	1.13	1.61	RP11-122K13.12	chr10	antisense	--
ENSG00000267756.1	1.02069	-0.15232	0.00134612	0.0688228	0.34	0.79	1.08	1.09	RP11-411B10.4	chr18	unprocessed_pseudogene	--
ENSG00000260439.1	5.03619	-2.9206	0.00810984	0.182001	0	0	0.04	0.11	LMF1-AS1	chr16	antisense	LMF1 antisense RNA 1
ENSG00000265802.2	-1.96392	-1.87562	0.00469926	0.13834	0.38	1.53	0.18	0.26	RN7SL49P	chr13	misc_RNA	RNA, 7SL, cytoplasmic 49, pseudogene
ENSG00000264853.1	1.99784	-1.63536	0.00110237	0.06079	0.02	0.04	0.09	0.15	RP11-16C1.2	chr17	sense_intronic	--
ENSG00000200914.1	-5.21726	-2.83289	0.00409817	0.126877	1.82	0.53	0	0	RNA5SP435	chr17	rRNA	RNA, 5S ribosomal pseudogene 435
ENSG00000232300.1	0.743091	1.18159	0.000490531	0.0382931	0.58	0.71	0.82	1.21	FAM215B	chr17	lincRNA	family with sequence similarity 215, member B (non-protein coding)
ENSG00000257698.1	-0.592787	2.31883	0.000237716	0.0251944	9.03	6.96	5.55	4.51	RP11-620J15.3	chr12	lincRNA	--
ENSG00000226900.1	5.03604	-2.92067	0.00810984	0.182001	0	0	0.04	0.29	RP11-432J24.5	chr10	lincRNA	--
ENSG00000170373.8	-1.81674	-1.5985	0.00258078	0.0990083	0.42	0.39	0	0.21	CST1	chr20	protein_coding	cystatin SN
ENSG00000111305.18	5.3493	-2.75069	0.00207364	0.0856591	0	0	0.03	0.06	GSG1	chr12	protein_coding	germ cell associated 1
ENSG00000168126.3	1.30864	-0.563455	0.000482197	0.037846	0.36	0.27	0.64	0.85	OR2W6P	chr6	unprocessed_pseudogene	olfactory receptor, family 2, subfamily W, member 6 pseudogene
ENSG00000219529.2	0.691918	0.98575	0.00226817	0.0910575	3.45	3.51	4.93	5.7	AP000580.1	chr11	processed_pseudogene	--
ENSG00000241935.8	1.7254	-1.21949	0.00055755	0.040887	0.03	0.08	0.27	0.09	HOGA1	chr10	protein_coding	4-hydroxy-2-oxoglutarate aldolase 1
ENSG00000116885.18	-0.76217	1.12967	0.000353565	0.0309263	1.17	1.33	0.57	0.82	OSCP1	chr1	protein_coding	organic solute carrier partner 1
ENSG00000269514.1	3.15539	-2.01317	0.000148308	0.0191416	0	0.02	0.12	0.03	RP11-370I10.12	chr12	lincRNA	--
ENSG00000184588.17	-1.97181	-1.67234	0.00175568	0.0817064	0.07	0.04	0.01	0.01	PDE4B	chr1	protein_coding	phosphodiesterase 4B, cAMP-specific
ENSG00000177989.13	-0.991281	-0.0372703	0.00167619	0.0803244	1.03	0.86	0.52	0.38	ODF3B	chr22	protein_coding	outer dense fiber of sperm tails 3B
ENSG00000104043.14	-1.32477	-0.919634	0.00264708	0.100617	0.06	0.13	0.05	0.02	ATP8B4	chr15	protein_coding	ATPase, class I, type 8B, member 4
ENSG00000253327.2	-1.46838	-1.08746	0.00195843	0.0856591	0.28	0.23	0.05	0.12	RAD21-AS1	chr8	antisense	RAD21 antisense RNA 1
ENSG00000132881.11	-0.625438	2.04983	0.000232635	0.0249289	2.8	2.66	2.02	1.34	RSG1	chr1	protein_coding	REM2 and RAB-like small GTPase 1
ENSG00000187186.14	-1.5281	-1.36582	0.00424839	0.130831	0.39	0.08	0.1	0.06	RP11-195F19.5	chr9	protein_coding	--
ENSG00000278999.1	2.12963	-1.75119	0.00111874	0.0614146	0.01	0.05	0.04	0.23	AC008985.1	chr19	TEC	--
ENSG00000171812.10	-1.68586	-1.52831	0.00360452	0.12271	0.12	0.04	0.01	0.04	COL8A2	chr1	protein_coding	collagen, type VIII, alpha 2
ENSG00000147082.17	-5.73602	-2.52788	0.000270728	0.0256926	0.04	0.04	0	0	CCNB3	chrX	protein_coding	cyclin B3
ENSG00000256453.1	-1.32891	-0.396132	0.000236066	0.0251112	0.49	0.57	0.25	0.14	DND1	chr5	protein_coding	DND microRNA-mediated repression inhibitor 1
ENSG00000280374.1	0.975527	-0.598919	0.00907459	0.195349	0.37	0.53	0.68	0.99	RP11-337N6.3	chr2	sense_intronic	--
ENSG00000279432.1	1.12294	0.101665	0.000131193	0.0177202	0.16	0.18	0.37	0.35	RP11-135N5.3	chr17	TEC	--
ENSG00000278979.1	5.48321	-2.67289	0.0010506	0.0600581	0	0	0.02	0.15	RP11-165M1.1	chr16	TEC	--
ENSG00000154133.14	-0.848091	0.801743	0.000276193	0.0259409	0.27	0.51	0.2	0.21	ROBO4	chr11	protein_coding	roundabout, axon guidance receptor, homolog 4 (Drosophila)
ENSG00000212306.1	5.35005	-2.75031	0.00207364	0.0856591	0	0	2.29	0.54	Y_RNA	chr15	misc_RNA	--
ENSG00000248599.1	-3.6139	-1.71051	2.40293e-06	0.00114654	0.14	0.25	0.01	0.01	FLJ42969	chr8	lincRNA	--
ENSG00000276077.4	-3.02601	-1.39682	1.06007e-06	0.00061569	0.26	0.09	0.01	0.03	CH507-254M2.2	chr21	lincRNA	--
ENSG00000271989.1	5.03664	-2.92037	0.00810984	0.182001	0	0	0.17	0.1	RP4-736L20.3	chr1	antisense	--
ENSG00000224388.1	1.15568	-0.0265049	0.000219614	0.0241586	1.03	1.49	1.99	3.32	BACE2-IT1	chr21	antisense	BACE2 intronic transcript 1
ENSG00000231473.2	-3.18445	-2.59841	0.00674452	0.172413	0.17	0.1	0	0.02	LINC00441	chr13	lincRNA	long intergenic non-protein coding RNA 441
ENSG00000267702.1	1.6024	-1.71063	0.00938088	0.198268	0.01	0.03	0.1	0.04	RP11-53B2.2	chr18	sense_intronic	--
ENSG00000259644.1	2.10724	-1.56367	0.000427756	0.0348348	0.08	0.04	0.1	0.42	RP11-680F8.4	chr15	sense_intronic	--
ENSG00000226332.2	-0.693178	1.10252	0.00124214	0.0649941	2.47	3.98	1.55	2.2	RP11-157P1.4	chr20	antisense	--
ENSG00000173762.7	-1.73941	-1.4935	0.00236042	0.0930076	0.12	0.18	0.09	0	CD7	chr17	protein_coding	CD7 molecule
ENSG00000248773.1	1.07902	0.208669	0.00013625	0.0181756	1.5	1.52	3.25	2.83	RP11-231L11.3	chr3	sense_intronic	--
ENSG00000280623.1	1.93984	-1.6729	0.00175568	0.0817064	0.03	0.01	0.05	0.08	PCAT14	chr22	lincRNA	prostate cancer associated transcript 14 (non-protein coding)
ENSG00000176244.6	1.59479	-1.4286	0.00322255	0.113709	0.08	0.11	0.31	0.25	ACBD7	chr10	protein_coding	acyl-CoA binding domain containing 7
ENSG00000237289.9	1.09268	-0.527482	0.00286892	0.105594	0.16	0.19	0.51	0.2	CKMT1B	chr15	protein_coding	creatine kinase, mitochondrial 1B
ENSG00000148677.6	1.00538	-0.528072	0.00585689	0.158809	0.17	0.19	0.38	0.3	ANKRD1	chr10	protein_coding	ankyrin repeat domain 1 (cardiac muscle)
ENSG00000272368.2	1.85802	-1.39723	0.000640276	0.043647	0.1	0.1	0.29	0.42	RP4-605O3.4	chr12	antisense	--
ENSG00000252010.1	1.13239	-0.943252	0.00854785	0.186639	0.61	1.14	1.77	1.87	SCARNA5	chr2	scaRNA	small Cajal body-specific RNA 5
ENSG00000187391.17	2.21482	-2.22002	0.0082457	0.182234	0.01	0	0.03	0.02	MAGI2	chr7	protein_coding	membrane associated guanylate kinase, WW and PDZ domain containing 2
ENSG00000230701.2	0.641231	0.75213	0.00892171	0.19306	0.43	0.54	0.78	0.65	FBXW4P1	chr22	processed_pseudogene	F-box and WD repeat domain containing 4 pseudogene 1
ENSG00000204389.9	2.39375	7.90975	1.04963e-99	1.01604e-95	26.91	25.83	120.35	141.96	HSPA1A	chr6	protein_coding	heat shock 70kDa protein 1A
ENSG00000006283.17	0.741288	1.06195	0.00082605	0.0522625	0.16	0.13	0.23	0.23	CACNA1G	chr17	protein_coding	calcium channel, voltage-dependent, T type, alpha 1G subunit
ENSG00000275672.1	1.72362	-1.22033	0.00055755	0.040887	0.04	0.16	0.25	0.38	GATM-AS1	chr15	antisense	entry withdrawn
ENSG00000225077.2	-1.40984	-0.138806	2.08159e-05	0.00530257	0.77	0.47	0.23	0.21	LINC00337	chr1	lincRNA	long intergenic non-protein coding RNA 337
ENSG00000277268.1	1.39612	-1.11315	0.00283599	0.105048	0.12	0.04	0.24	0.17	RP11-445F12.1	chr17	antisense	--
ENSG00000168298.5	0.730945	1.57842	0.000127747	0.017499	2.47	3.2	3.99	4.9	HIST1H1E	chr6	protein_coding	histone cluster 1, H1e
ENSG00000259727.1	-1.28039	-1.11295	0.00711547	0.177	0.6	0.19	0.2	0.11	RP11-1069G10.2	chr15	lincRNA	--
ENSG00000256188.2	3.08175	-2.06244	0.000265014	0.0256926	0.02	0.02	0.16	0.11	TAS2R30	chr12	protein_coding	taste receptor, type 2, member 30
ENSG00000088726.15	-0.668438	1.30469	0.00119935	0.0637898	1.13	0.87	0.76	0.44	TMEM40	chr3	protein_coding	transmembrane protein 40
ENSG00000266313.1	-5.49978	-2.67236	0.0010506	0.0600581	0.43	0.25	0	0	RP11-173M1.4	chr17	lincRNA	--
ENSG00000100055.20	-0.587491	1.42857	0.00299794	0.108015	0.67	0.91	0.4	0.59	CYTH4	chr22	protein_coding	cytohesin 4
ENSG00000280269.1	1.61004	-0.634817	4.25505e-05	0.00901946	0.06	0.49	0.93	0.68	AP000577.2	chr11	TEC	--
ENSG00000277149.4	0.669153	1.58262	0.000445026	0.0358987	0.56	0.62	0.84	0.94	TYW1B	chr7	protein_coding	tRNA-yW synthesizing protein 1 homolog B (S. cerevisiae)
ENSG00000280422.1	2.39215	-2.1132	0.00291262	0.106389	0	0.04	0.09	0.13	RP11-155D18.13	chr3	TEC	--
ENSG00000258904.1	2.39695	-0.51132	3.23624e-09	3.75922e-06	0.16	0.48	1.68	1.55	RP11-638I2.2	chr14	sense_intronic	--
ENSG00000272574.1	1.20445	-0.20718	0.000316078	0.0283299	0.67	0.96	1.18	2.35	RP11-359K18.4	chr1	sense_intronic	--
ENSG00000275769.1	1.62844	-0.478531	1.1649e-05	0.00342169	0.61	0.68	1.24	2.54	RP11-771K4.3	chr12	sense_intronic	--
ENSG00000272088.1	5.72075	-2.52776	0.000270728	0.0256926	0	0	0.85	0.07	RP11-168F9.2	chr1	lincRNA	--
ENSG00000197714.8	0.75957	1.94501	1.4662e-05	0.00401682	0.68	0.72	0.94	1.3	ZNF460	chr19	protein_coding	zinc finger protein 460
ENSG00000104888.9	-1.30882	-0.853783	0.00229125	0.0912729	0.15	0.24	0.08	0.07	SLC17A7	chr19	protein_coding	solute carrier family 17 (vesicular glutamate transporter), member 7
ENSG00000223561.6	3.15572	-2.59833	0.00674452	0.172413	0	0.01	0.08	0.03	AC003090.1	chr7	lincRNA	--
ENSG00000183638.5	-2.14412	-0.527403	9.39579e-08	8.80174e-05	0.08	0.14	0.02	0.03	RP1L1	chr8	protein_coding	retinitis pigmentosa 1-like 1
ENSG00000012779.10	-1.16523	-0.396504	0.00117765	0.0633312	0.41	0.23	0.17	0.1	ALOX5	chr10	protein_coding	arachidonate 5-lipoxygenase
ENSG00000139239.7	-2.28176	-1.67215	0.000417884	0.0348348	0.52	0.57	0.13	0.08	RPL14P1	chr12	processed_pseudogene	ribosomal protein L14 pseudogene 1
ENSG00000280328.1	1.15106	1.07329	2.62755e-07	0.000206227	0.27	0.28	0.59	0.57	RP11-972P1.7	chr12	TEC	--
ENSG00000100024.14	-3.38481	-1.87579	2.56121e-05	0.00619812	0.08	0.09	0	0.01	UPB1	chr22	protein_coding	ureidopropionase, beta
ENSG00000206559.7	-2.29168	-1.46031	9.99266e-05	0.0148055	0.08	0.42	0.05	0.05	ZCWPW2	chr3	protein_coding	zinc finger, CW type with PWWP domain 2
ENSG00000264278.1	-1.77247	-1.33535	0.000922079	0.0556698	0.39	0.29	0.06	0.12	RP11-162A12.2	chr18	lincRNA	--
ENSG00000185186.8	-1.13069	0.157562	0.000134074	0.0180255	0.65	0.56	0.42	0.12	LINC00313	chr21	lincRNA	long intergenic non-protein coding RNA 313
ENSG00000226432.3	-1.31994	-1.27647	0.00973789	0.203738	0.64	0.33	0.19	0.18	CTD-2015B23.2	chr5	processed_pseudogene	--
ENSG00000198807.12	0.654978	2.88454	6.75973e-06	0.00243614	0.85	0.97	1.35	1.35	PAX9	chr14	protein_coding	paired box 9
ENSG00000278126.1	-0.899455	0.0114723	0.00374869	0.12413	0.84	1.49	0.79	0.4	RP11-454E5.4	chr12	sense_intronic	--
ENSG00000178636.8	-2.95392	-2.16547	0.0008382	0.0523469	0.13	0.07	0	0.02	RP11-455G16.1	chr4	transcribed_processed_pseudogene	--
ENSG00000227200.1	2.54315	-2.39676	0.00795712	0.182001	0.15	0	0.66	0.28	RP11-121A14.3	chr9	sense_intronic	--
ENSG00000133020.4	-1.01017	-0.445111	0.00566511	0.156086	0.16	0.09	0.03	0.09	MYH8	chr17	protein_coding	myosin, heavy chain 8, skeletal muscle, perinatal
ENSG00000274987.1	2.23559	-1.92089	0.00181332	0.082406	0	0.2	0.19	0.71	RP11-295I5.3	chr12	antisense	--
ENSG00000233830.2	2.54225	-2.39706	0.00795712	0.182001	0	0.08	0.16	0.34	EIF4HP1	chr7	processed_pseudogene	eukaryotic translation initiation factor 4H pseudogene 1
ENSG00000105695.14	-5.73587	-2.52795	0.000270728	0.0256926	0.09	0.06	0	0	MAG	chr19	protein_coding	myelin associated glycoprotein
ENSG00000253305.2	5.03588	-2.92075	0.00810984	0.182001	0	0	0	0.03	PCDHGB6	chr5	protein_coding	protocadherin gamma subfamily B, 6
ENSG00000211891.5	-1.22042	0.794532	4.23477e-07	0.000299946	1.67	1.15	0.67	0.48	IGHE	chr14	IG_C_gene	immunoglobulin heavy constant epsilon
ENSG00000178217.13	-5.05236	-2.92027	0.00810984	0.182001	0.03	0.03	0	0	SH2D4B	chr10	protein_coding	SH2 domain containing 4B
ENSG00000236654.2	2.30638	-1.87588	0.00109183	0.0606247	0	0.55	1.71	1	AC079780.3	chr7	processed_pseudogene	--
ENSG00000268670.1	1.36068	-0.24895	6.95009e-05	0.011795	0.41	0.67	0.91	1.7	CTD-2622I13.3	chr19	sense_intronic	--
ENSG00000168135.4	-2.33739	-1.42849	6.10633e-05	0.0111527	0.31	0.11	0.04	0.04	KCNJ4	chr22	protein_coding	potassium channel, inwardly rectifying subfamily J, member 4
ENSG00000272189.1	-1.89016	-1.92022	0.00748163	0.182001	0.16	0.12	0.04	0.03	RP3-325F22.5	chr6	antisense	--
ENSG00000132002.7	1.47653	7.31621	6.81775e-41	2.82839e-37	29.85	28.77	70.21	84.15	DNAJB1	chr19	protein_coding	DnaJ (Hsp40) homolog, subfamily B, member 1
ENSG00000279841.1	2.50187	-0.943132	2.06539e-07	0.000166608	0	0.12	0.38	0.29	RP11-274A11.4	chr16	TEC	--
ENSG00000267707.2	2.54188	-2.39732	0.00795712	0.182001	0.04	0.04	0.04	0.44	RP11-95O2.5	chr18	antisense	--
ENSG00000252414.1	3.27849	-2.52799	0.00367993	0.12271	0	0.27	2.05	0.98	RNU6-100P	chr2	snRNA	RNA, U6 small nuclear 100, pseudogene
ENSG00000251521.2	-5.05207	-2.92042	0.00810984	0.182001	0.23	0	0	0	IMPA1P	chr8	transcribed_unprocessed_pseudogene	inositol(myo)-1(or 4)-monophosphatase 1 pseudogene
ENSG00000260626.1	2.64722	-2.33574	0.00457034	0.135487	0.05	0.05	0.19	0.46	RP11-23E10.3	chr16	lincRNA	--
ENSG00000236307.2	-1.70377	-1.13886	0.000512285	0.0394609	1.5	0.86	0.38	0.3	EEF1E1P1	chr2	processed_pseudogene	eukaryotic translation elongation factor 1 epsilon 1 pseudogene 1
ENSG00000231181.1	1.80952	-1.42886	0.000994447	0.0592694	0.15	0.26	0.58	0.79	RP13-15M17.1	chr1	processed_pseudogene	--
ENSG00000252234.1	3.39124	-2.46118	0.00200016	0.0856591	0.26	0	1.25	1.9	AC006557.1	chr18	miRNA	--
ENSG00000165121.10	0.918986	0.594069	0.00026322	0.0256926	0.66	0.36	0.79	1.05	RP11-213G2.3	chr9	unprocessed_pseudogene	--
ENSG00000237977.1	1.05674	0.288547	0.000157447	0.019708	0.9	1.37	2.07	2.39	EIF4HP2	chr22	processed_pseudogene	eukaryotic translation initiation factor 4H pseudogene 2
ENSG00000226416.1	-1.30856	-0.85406	0.00229125	0.0912729	0.33	0.3	0.12	0.12	MRPL23-AS1	chr11	antisense	MRPL23 antisense RNA 1
ENSG00000214822.8	2.47322	-2.06285	0.00171479	0.0811649	0.02	0.01	0.06	0.14	KRT16P3	chr17	transcribed_unprocessed_pseudogene	keratin 16 pseudogene 3
ENSG00000275978.1	5.03588	-2.92075	0.00810984	0.182001	0	0	0	0.66	Metazoa_SRP	chr14	misc_RNA	--
ENSG00000248514.1	-2.11821	-2.01313	0.00491267	0.141808	0.37	0.75	0.18	0.06	CTC-338M12.1	chr5	antisense	--
ENSG00000243806.1	5.20084	-2.83333	0.00409817	0.126877	0	0	0	0.32	RPL7P18	chr5	processed_pseudogene	ribosomal protein L7 pseudogene 18
ENSG00000070526.14	5.03604	-2.92067	0.00810984	0.182001	0	0	0.01	0.06	ST6GALNAC1	chr17	protein_coding	ST6 (alpha-N-acetyl-neuraminyl-2,3-beta-galactosyl-1,3)-N-acetylgalactosaminide alpha-2,6-sialyltransferase 1
ENSG00000205822.10	0.78636	0.580366	0.00200395	0.0856591	0.31	0.68	1.03	0.58	TPTE2P6	chr13	transcribed_unprocessed_pseudogene	transmembrane phosphoinositide 3-phosphatase and tensin homolog 2 pseudogene 6
ENSG00000132016.11	-0.951556	0.828915	5.7445e-05	0.0107148	0.58	0.74	0.36	0.28	C19orf57	chr19	protein_coding	chromosome 19 open reading frame 57
ENSG00000279416.1	3.27737	-2.52863	0.00367993	0.12271	0.02	0	0	0.24	RP11-849I19.2	chr18	TEC	--
ENSG00000280372.1	3.05092	-1.67317	1.20972e-05	0.00342169	0	0.06	0.11	0.36	bP-21201H5.2	chr21	TEC	--
ENSG00000244218.3	0.887547	0.0559542	0.00324996	0.113904	2.15	2.3	2.91	4.85	RN7SL81P	chr7	misc_RNA	RNA, 7SL, cytoplasmic 81, pseudogene
ENSG00000276107.1	0.9381	-0.0876479	0.00249705	0.0966053	0.57	0.82	1.3	1.23	CTD-2033D15.2	chr15	sense_intronic	--
ENSG00000241782.1	1.44591	-1.39722	0.00626582	0.165064	0.24	0.36	0.57	0.98	RP11-91P24.1	chr11	processed_pseudogene	--
ENSG00000271980.1	-3.52564	-2.39669	0.00108371	0.0606247	0.08	0.08	0	0.01	CTD-2256P15.4	chr5	antisense	--
ENSG00000257649.1	5.35036	-2.75016	0.00207364	0.0856591	0	0	0.55	0	METTL7AP1	chr12	processed_pseudogene	methyltransferase like 7A pseudogene 1
ENSG00000102359.5	1.81705	-1.74996	0.00437312	0.132242	0.03	0.05	0.24	0.04	SRPX2	chrX	protein_coding	sushi-repeat containing protein, X-linked 2
ENSG00000281325.1	1.31029	-1.16625	0.00584759	0.158809	0.12	0.08	0.14	0.34	AC016549.1	chr5	protein_coding	--
ENSG00000273893.1	0.78741	-0.0376208	0.00945012	0.198719	0.64	0.98	1.47	1.18	RP1-101A2.1	chr20	sense_intronic	--
ENSG00000267013.5	-5.05265	-2.92012	0.00810984	0.182001	0	0.07	0	0	CTD-2171N6.1	chr18	lincRNA	--
ENSG00000233671.1	2.61252	-0.7118	4.83695e-09	5.40251e-06	0.04	0.15	0.41	0.68	AC083899.1	chr2	processed_pseudogene	--
ENSG00000204956.5	-1.03803	0.531284	7.53418e-05	0.0122231	0.3	0.21	0.13	0.1	PCDHGA1	chr5	protein_coding	protocadherin gamma subfamily A, 1
ENSG00000272195.1	0.857705	0.102069	0.00309783	0.110382	0.29	0.41	0.67	0.54	RP11-156E8.1	chr1	antisense	--
ENSG00000105996.6	-2.03643	-2.06228	0.00800342	0.182001	0.19	0.08	0.04	0.01	HOXA2	chr7	protein_coding	homeobox A2
ENSG00000081277.11	-1.35912	-0.75031	0.00100643	0.0592834	0.08	0.16	0.01	0.07	PKP1	chr1	protein_coding	plakophilin 1
ENSG00000257880.1	5.34885	-2.75092	0.00207364	0.0856591	0	0	0	0.54	RP11-769N19.2	chr12	sense_intronic	--
ENSG00000234494.7	0.980646	0.355626	0.000258436	0.0256926	0.35	0.34	0.72	0.58	SP2-AS1	chr17	antisense	SP2 antisense RNA 1
ENSG00000175741.5	-2.24589	-2.22002	0.0082457	0.182234	0.55	0.2	0	0.14	RWDD4P2	chr7	processed_pseudogene	RWD domain containing 4 pseudogene 2
ENSG00000158055.15	-1.84807	-1.75044	0.00437312	0.132242	0.1	0.08	0.01	0.04	GRHL3	chr1	protein_coding	grainyhead-like 3 (Drosophila)
ENSG00000237857.2	-0.978967	1.08065	9.17225e-06	0.00295958	1.62	1.69	0.89	0.7	RP11-435O5.2	chr9	lincRNA	--
ENSG00000250687.6	5.03634	-2.92052	0.00810984	0.182001	0	0	0.07	0.12	RP11-497H16.7	chr5	transcribed_unprocessed_pseudogene	--
ENSG00000267681.1	2.69278	-1.92078	0.000339564	0.0300337	0.09	0.19	0.63	1.21	CTD-3199J23.6	chr17	transcribed_processed_pseudogene	--
ENSG00000120328.6	1.42058	-0.91969	0.00104722	0.0600581	0.02	0.09	0.22	0.07	PCDHB12	chr5	protein_coding	protocadherin beta 12
ENSG00000244459.2	-5.49985	-2.67233	0.0010506	0.0600581	0.29	0.25	0	0	RP11-1398P2.1	chr4	lincRNA	--
ENSG00000274292.1	0.975305	-0.545837	0.00774292	0.182001	0.08	0.2	0.19	0.32	RP11-347I19.7	chr12	lincRNA	--
ENSG00000273669.1	-1.44318	-1.30518	0.00544045	0.152151	0.47	0.82	0.29	0.16	RP11-405M12.4	chr18	lincRNA	--
ENSG00000266821.1	-3.42068	-2.46066	0.00200016	0.0856591	0.04	0.09	0.01	0	RP11-6N17.2	chr17	lincRNA	--
ENSG00000135324.5	-1.29983	-1.1924	0.00832122	0.183186	0.21	0.21	0.05	0.11	MRAP2	chr6	protein_coding	melanocortin 2 receptor accessory protein 2
ENSG00000047936.10	5.92265	-2.39699	7.01219e-05	0.011795	0	0	0.03	0.03	ROS1	chr6	protein_coding	ROS proto-oncogene 1 , receptor tyrosine kinase
ENSG00000229473.2	2.3588	-1.59915	0.000153266	0.0194359	0.05	0.21	0.29	0.98	RGS17P1	chr13	processed_pseudogene	regulator of G-protein signaling 17 pseudogene 1
ENSG00000261819.1	1.65463	-1.52774	0.00360452	0.12271	0.04	0.07	0.27	0.1	RP11-680G24.4	chr16	processed_pseudogene	--
ENSG00000269873.1	-5.05236	-2.92027	0.00810984	0.182001	0.33	0.34	0	0	CTD-2587H19.3	chr19	lincRNA	--
ENSG00000133083.14	5.20084	-2.83333	0.00409817	0.126877	0	0	0	0.02	DCLK1	chr13	protein_coding	doublecortin-like kinase 1
ENSG00000279766.1	1.65391	-1.52825	0.00360452	0.12271	0.21	0.13	0.53	0.5	RP11-642A1.2	chr8	TEC	--
ENSG00000259732.1	2.54255	-2.39691	0.00795712	0.182001	0	0.09	0.26	0.29	RP11-59H7.3	chr15	sense_overlapping	--
ENSG00000004776.11	1.92169	-1.08731	6.50068e-05	0.0116531	0.07	0.1	0.39	0.21	HSPB6	chr19	protein_coding	heat shock protein, alpha-crystallin-related, B6
ENSG00000115963.13	0.599601	5.58429	1.13026e-07	0.000102571	11.36	11.01	14.97	17.11	RND3	chr2	protein_coding	Rho family GTPase 3
ENSG00000204876.4	-0.801039	1.36941	6.76864e-05	0.011795	1.18	0.97	0.46	0.7	AC021218.2	chr7	lincRNA	--
ENSG00000258748.1	-2.24564	-2.21969	0.0082457	0.182234	0.49	0.43	0.18	0	CTD-2223O18.1	chr14	antisense	--
ENSG00000256061.7	-1.32664	-0.634446	0.000769076	0.0493024	0.33	0.26	0.16	0.06	DYX1C1	chr15	protein_coding	dyslexia susceptibility 1 candidate 1
ENSG00000230177.1	1.1705	0.0211104	0.000144845	0.0189473	1.31	0.46	1.66	2.13	RP5-1112D6.4	chr6	antisense	--
ENSG00000281883.1	6.46638	-2.01436	6.45305e-07	0.000416437	0	0	0.03	0.29	RP11-65B7.2	chr13	protein_coding	--
ENSG00000272631.1	0.644572	1.07868	0.00342523	0.117994	0.22	0.2	0.28	0.34	RP11-359E3.4	chr10	antisense	--
ENSG00000233527.8	1.07578	0.471461	4.50881e-05	0.00928623	0.4	0.39	0.81	0.79	ZNF529-AS1	chr19	antisense	ZNF529 antisense RNA 1
ENSG00000267397.1	-1.06988	-0.0251702	0.000674174	0.0456364	0.68	0.64	0.3	0.29	RP11-873E20.1	chr18	lincRNA	--
ENSG00000232623.1	-2.33783	-2.16511	0.00491738	0.141808	0.14	0.64	0.09	0.04	AP000266.7	chr21	antisense	--
ENSG00000079385.21	-0.753561	2.66218	5.79591e-07	0.00038253	1.8	1.82	0.71	1.31	CEACAM1	chr19	protein_coding	carcinoembryonic antigen-related cell adhesion molecule 1 (biliary glycoprotein)
ENSG00000235748.1	1.09098	-0.192476	0.000776586	0.0496741	1.15	0.41	1.99	1.2	SEPT14P12	chr1	processed_pseudogene	septin 14 pseudogene 12
ENSG00000197520.10	-0.873258	-0.0746141	0.00634585	0.166621	0.71	0.88	0.35	0.46	FAM177B	chr1	protein_coding	family with sequence similarity 177, member B
ENSG00000236882.7	-1.03486	-0.381229	0.00369322	0.122994	0.51	0.28	0.17	0.19	LINC01554	chr5	lincRNA	long intergenic non-protein coding RNA 1554
ENSG00000205639.9	5.20145	-2.83303	0.00409817	0.126877	0	0	0.04	0.04	MFSD2B	chr2	protein_coding	major facilitator superfamily domain containing 2B
ENSG00000277568.1	3.27767	-2.52848	0.00367993	0.12271	0.18	0	0.35	1.66	uc_338	chr5	misc_RNA	--
ENSG00000275741.1	5.03634	-2.92052	0.00810984	0.182001	0	0	0.16	0.25	RP11-40E6.1	chr13	antisense	--
ENSG00000250616.2	-1.75751	-1.63491	0.00399557	0.126877	0.29	0.12	0.07	0.05	RP11-455F5.3	chr16	antisense	--
ENSG00000272851.1	-3.18571	-2.01291	0.000148308	0.0191416	0.1	0.91	0.1	0	RP11-801F7.1	chr2	antisense	--
ENSG00000228107.1	1.08332	-0.832863	0.0084544	0.185295	0.28	0.62	1	0.82	AP000692.9	chr21	sense_overlapping	--
ENSG00000185250.15	1.00554	-0.580865	0.00685153	0.173468	0.07	0.09	0.14	0.17	PPIL6	chr6	protein_coding	peptidylprolyl isomerase (cyclophilin)-like 6
ENSG00000112852.6	-1.47772	-0.989288	0.00118809	0.063423	0.14	0.13	0.05	0.04	PCDHB2	chr5	protein_coding	protocadherin beta 2
ENSG00000228906.1	-1.14428	-0.750444	0.00530562	0.149733	1.49	1.27	0.42	0.75	RP13-216E22.4	chrX	lincRNA	--
ENSG00000270062.1	2.00074	-1.83333	0.00293082	0.106389	0.17	0.12	0.38	0.73	RP11-248J18.3	chr14	sense_intronic	--
ENSG00000241352.3	-2.57357	-2.39669	0.00795712	0.182001	0.18	0.3	0	0.07	RP11-392P7.1	chr12	processed_pseudogene	--
ENSG00000171811.12	-5.05258	-2.92016	0.00810984	0.182001	0	0.02	0	0	CFAP46	chr10	protein_coding	cilia and flagella associated protein 46
ENSG00000132357.13	-0.692269	1.02816	0.0015369	0.0755187	0.44	0.51	0.23	0.32	CARD6	chr5	protein_coding	caspase recruitment domain family, member 6
ENSG00000133477.16	-0.752749	1.60369	7.35859e-05	0.0121417	0.2	0.2	0.11	0.12	FAM83F	chr22	protein_coding	family with sequence similarity 83, member F
ENSG00000234329.1	1.38042	-0.397834	9.80616e-05	0.0146789	0.53	0.29	0.76	1.28	RP11-767N6.2	chr1	processed_pseudogene	--
ENSG00000149646.12	-2.77596	-2.2763	0.00260952	0.09958	0.05	0.05	0.01	0	CNBD2	chr20	protein_coding	cyclic nucleotide binding domain containing 2
ENSG00000259151.2	4.0035	-2.06251	2.6284e-05	0.00625645	0.02	0	0.21	0.17	CAP2P1	chr14	transcribed_processed_pseudogene	CAP, adenylate cyclase-associated protein, 2 (yeast) pseudogene 1
ENSG00000274364.1	2.62449	-1.96609	0.00058519	0.041512	0.23	0	1.04	0.43	RP3-324O17.7	chr20	sense_intronic	--
ENSG00000121310.16	-0.689796	1.5021	0.000373039	0.0323374	2.05	1.61	1.11	1.04	ECHDC2	chr1	protein_coding	enoyl CoA hydratase domain containing 2
ENSG00000168676.10	5.03604	-2.92067	0.00810984	0.182001	0	0	0.01	0.06	KCTD19	chr16	protein_coding	potassium channel tetramerization domain containing 19
ENSG00000220412.1	-3.62346	-2.3353	0.000585616	0.041512	0.13	0.11	0	0.01	RP11-95M15.2	chr6	processed_pseudogene	--
ENSG00000243696.4	-1.38645	-1.13844	0.00408417	0.126877	0.05	0.12	0.04	0.02	RP5-966M1.6	chr3	protein_coding	--
ENSG00000185974.6	-1.36872	-0.545441	0.000344507	0.0303167	0.21	0.15	0.04	0.09	GRK1	chr13	protein_coding	G protein-coupled receptor kinase 1
ENSG00000128536.15	-0.729586	0.437788	0.00680577	0.173216	0.43	0.29	0.26	0.15	CDHR3	chr7	protein_coding	cadherin-related family member 3
ENSG00000184068.2	1.59306	-1.42919	0.00322255	0.113709	0	0.09	0.05	0.2	RP5-821D11.7	chr22	antisense	--
ENSG00000156298.12	5.35005	-2.75031	0.00207364	0.0856591	0	0	0.11	0.03	TSPAN7	chrX	protein_coding	tetraspanin 7
ENSG00000237476.1	3.77241	-2.21991	0.000169948	0.0205638	0.04	0	0.44	0.23	XXbac-B135H6.15	chr22	lincRNA	--
ENSG00000196972.7	-2.63513	-1.42828	1.17257e-05	0.00342169	0.16	0.18	0.01	0.04	SMIM10L2B	chrX	protein_coding	small integral membrane protein 10 like 2B
ENSG00000132122.11	-0.778528	0.489453	0.00333028	0.115966	0.33	0.25	0.18	0.14	SPATA6	chr1	protein_coding	spermatogenesis associated 6
ENSG00000204936.9	-0.742994	0.679548	0.00193371	0.085602	0.79	0.61	0.36	0.43	CD177	chr19	protein_coding	CD177 molecule
ENSG00000237840.6	-1.62714	-1.4279	0.00322255	0.113709	0.08	0.3	0.08	0.04	FAM21FP	chr10	transcribed_unprocessed_pseudogene	family with sequence similarity 21, member F, pseudogene
ENSG00000238181.2	5.03588	-2.92075	0.00810984	0.182001	0	0	0	0.16	AHCYP2	chr9	processed_pseudogene	adenosylhomocysteinase pseudogene 2
ENSG00000255277.3	-5.05265	-2.92012	0.00810984	0.182001	0	0.21	0	0	ABCC6P2	chr16	transcribed_unprocessed_pseudogene	ATP-binding cassette, sub-family C, member 6 pseudogene 2
ENSG00000234810.1	-5.05236	-2.92027	0.00810984	0.182001	0.03	0.03	0	0	RP11-466L17.1	chr1	lincRNA	--
ENSG00000112559.13	-0.864611	0.772654	0.000284824	0.0265958	1.25	0.76	0.39	0.65	MDFI	chr6	protein_coding	MyoD family inhibitor
ENSG00000182165.17	-1.09397	0.229293	0.000156444	0.019708	1.51	1.2	0.43	0.76	TP53TG1	chr7	lincRNA	TP53 target 1 (non-protein coding)
ENSG00000186994.11	-1.80302	-0.966367	9.12318e-05	0.0141024	0.19	0.14	0	0.09	KANK3	chr19	protein_coding	KN motif and ankyrin repeat domains 3
ENSG00000262228.2	1.06132	-0.546121	0.0038518	0.126877	0.08	0.31	0.22	0.55	RP11-676J12.4	chr17	lincRNA	--
ENSG00000229124.6	-0.667396	0.998607	0.00239567	0.0940138	1.06	0.97	0.55	0.66	VIM-AS1	chr10	antisense	VIM antisense RNA 1
ENSG00000267644.1	-5.05258	-2.92016	0.00810984	0.182001	0.04	0.28	0	0	CTD-2008P7.10	chr17	lincRNA	--
ENSG00000196993.8	-1.26397	-0.493033	0.000709552	0.0465991	0.32	0.42	0.26	0.04	NPIPB9	chr16	protein_coding	nuclear pore complex interacting protein family, member B9
ENSG00000204361.8	0.80691	0.35512	0.00298337	0.108012	0.4	0.4	0.61	0.72	NXPE2	chr11	protein_coding	neurexophilin and PC-esterase domain family, member 2
ENSG00000197361.6	1.16748	-0.653683	0.00244403	0.0953697	0.1	0.06	0.2	0.15	FBXL22	chr15	protein_coding	F-box and leucine-rich repeat protein 22
ENSG00000235072.2	-2.52755	-1.75042	0.0002314	0.0249178	0.31	0.06	0.05	0.01	AC012074.2	chr2	lincRNA	--
ENSG00000254473.1	-1.16582	-0.396204	0.00117765	0.0633312	0.77	0.84	0.43	0.25	RP11-522I20.3	chr9	antisense	--
ENSG00000272789.1	-1.03919	-0.634529	0.00802843	0.182001	0.72	0.84	0.41	0.3	RP11-286H15.1	chr2	antisense	--
ENSG00000254554.1	0.710675	0.898595	0.00179346	0.082406	1.54	1.35	1.86	2.61	RP11-351I24.1	chr11	antisense	--
ENSG00000100298.15	-1.31163	-0.710542	0.00123236	0.064813	0.56	0.6	0.24	0.2	APOBEC3H	chr22	protein_coding	apolipoprotein B mRNA editing enzyme, catalytic polypeptide-like 3H
ENSG00000148734.7	1.3807	-1.22024	0.00471615	0.13834	0.03	0.01	0.05	0.05	NPFFR1	chr10	protein_coding	neuropeptide FF receptor 1
ENSG00000174607.10	0.846744	0.479548	0.00115155	0.0623897	0.15	0.2	0.24	0.36	UGT8	chr4	protein_coding	UDP glycosyltransferase 8
ENSG00000176092.13	-0.656716	3.06224	3.78109e-06	0.00159134	1.63	1.67	0.98	1	AIM1L	chr1	protein_coding	absent in melanoma 1-like
ENSG00000198932.12	0.916355	0.744888	0.000113374	0.0159824	0.18	0.14	0.32	0.24	GPRASP1	chrX	protein_coding	G protein-coupled receptor associated sorting protein 1
ENSG00000225178.5	-1.34058	-0.444238	0.000267757	0.0256926	1.07	0.77	0.43	0.26	RPSAP58	chr19	processed_pseudogene	ribosomal protein SA pseudogene 58
ENSG00000161277.10	-0.639704	1.4518	0.00131028	0.0677056	1.48	1.56	1.16	0.69	THAP8	chr19	protein_coding	THAP domain containing 8
ENSG00000105708.8	0.596008	2.86068	4.33815e-05	0.00912898	1.72	1.59	2.56	2.18	ZNF14	chr19	protein_coding	zinc finger protein 14
ENSG00000088827.12	2.54338	-2.39657	0.00795712	0.182001	0	0	0.04	0.01	SIGLEC1	chr20	protein_coding	sialic acid binding Ig-like lectin 1, sialoadhesin
ENSG00000067601.7	-0.902121	0.0460396	0.00324996	0.113904	1.01	1.03	0.62	0.42	PMS2P4	chr7	transcribed_unprocessed_pseudogene	postmeiotic segregation increased 2 pseudogene 4
ENSG00000261514.1	2.76	-1.87602	0.000196276	0.0227994	0.13	0.07	0.81	0.54	RP11-527L4.2	chr17	lincRNA	--
ENSG00000248994.1	-0.857004	-0.0503506	0.006927	0.174834	1.52	1.23	0.42	1.01	RP11-259O2.1	chr5	lincRNA	--
ENSG00000028137.16	-0.895011	2.19123	6.71429e-08	6.49943e-05	1.39	1.31	0.61	0.76	TNFRSF1B	chr1	protein_coding	tumor necrosis factor receptor superfamily, member 1B
ENSG00000196267.12	-0.737609	1.01086	0.000967768	0.0579464	0.67	0.51	0.37	0.3	ZNF836	chr19	protein_coding	zinc finger protein 836
ENSG00000118777.10	-0.888368	0.828898	0.000162866	0.0201261	0.44	0.35	0.27	0.13	ABCG2	chr4	protein_coding	ATP-binding cassette, sub-family G (WHITE), member 2 (Junior blood group)
ENSG00000245750.7	-2.65521	-1.96597	0.00058519	0.041512	0.16	0.2	0.02	0.03	DRAIC	chr15	lincRNA	downregulated RNA in cancer, inhibitor of cell invasion and migration
ENSG00000100068.11	0.654549	3.16792	2.91028e-06	0.00132054	1.35	1.48	1.67	2.54	LRP5L	chr22	protein_coding	low density lipoprotein receptor-related protein 5-like
ENSG00000243986.2	5.03664	-2.92037	0.00810984	0.182001	0	0	0.11	0.06	ENO1P3	chr3	processed_pseudogene	enolase 1, (alpha) pseudogene 3
ENSG00000162576.16	-1.04071	-0.691958	0.00942376	0.198453	0.27	0.14	0.04	0.14	MXRA8	chr1	protein_coding	matrix-remodelling associated 8
ENSG00000250838.1	-2.26796	-1.92014	0.00181332	0.082406	0.72	0.6	0.19	0.06	RP11-501C14.5	chr17	antisense	--
ENSG00000182459.4	-0.794048	0.497368	0.00206479	0.0856591	0.81	0.69	0.32	0.49	TEX19	chr17	protein_coding	testis expressed 19
ENSG00000273769.4	3.08138	-2.06255	0.000265014	0.0256926	0	0.04	0.18	0.19	LCA10	chrX	processed_transcript	--
ENSG00000243648.1	-5.21719	-2.83292	0.00409817	0.126877	0.45	0.06	0	0	RP11-215P8.1	chr5	processed_pseudogene	--
ENSG00000274331.1	-1.84849	-1.75022	0.00437312	0.132242	0.1	0.27	0.02	0.08	RP11-403A3.1	chr13	lincRNA	--
ENSG00000248664.1	-3.25515	-1.96564	8.27758e-05	0.0132077	0.12	0.51	0.06	0	CTC-498J12.3	chr5	antisense	--
ENSG00000244486.7	-0.865503	0.446408	0.0010552	0.0602024	0.33	0.49	0.18	0.24	SCARF2	chr22	protein_coding	scavenger receptor class F, member 2
ENSG00000240106.2	1.81551	-1.75067	0.00437312	0.132242	0.09	0.48	0.82	1.13	RN7SL146P	chr19	misc_RNA	RNA, 7SL, cytoplasmic 146, pseudogene
ENSG00000269082.1	-0.747222	0.75979	0.00185783	0.0838671	3.05	3.25	1.91	1.64	CTD-2620I22.1	chr19	processed_transcript	--
ENSG00000213144.2	2.59375	-1.03826	2.83125e-07	0.000210819	0.36	0	1.05	1.09	RP11-64B16.2	chr12	processed_pseudogene	--
ENSG00000269578.1	3.52904	-1.75071	4.35055e-06	0.00173069	0.05	0	0.33	0.31	CTD-3222D19.5	chr19	sense_intronic	--
ENSG00000213033.4	0.797633	1.63002	2.45233e-05	0.0060868	1.41	1.69	2.67	2.45	AURKAPS1	chr1	transcribed_processed_pseudogene	aurora kinase A pseudogene 1
ENSG00000164304.15	-5.05243	-2.92023	0.00810984	0.182001	0.02	0.04	0	0	CAGE1	chr6	protein_coding	cancer antigen 1
ENSG00000184530.8	3.68633	-2.27645	0.000315763	0.0283299	0.02	0	0.25	0.11	C6orf58	chr6	protein_coding	chromosome 6 open reading frame 58
ENSG00000199293.1	1.22503	-0.61689	0.00129258	0.0669101	1.7	2.81	4.73	5.29	SNORA21	chr17	snoRNA	small nucleolar RNA, H/ACA box 21
ENSG00000201512.1	0.898935	0.833981	0.000120449	0.0168165	7.75	7.45	13.58	13.31	SNORA71C	chr20	snoRNA	small nucleolar RNA, H/ACA box 71C
ENSG00000183281.14	0.899614	0.437248	0.000560416	0.0409937	0.51	0.35	0.92	0.61	PLGLB1	chr2	protein_coding	plasminogen-like B1
ENSG00000270021.1	-1.97207	-1.6719	0.00175568	0.0817064	0.1	0.24	0.07	0.01	CTC-203F4.2	chr5	antisense	--
ENSG00000270332.1	-2.67843	-2.33519	0.00457034	0.135487	0.02	0.04	0	0	SMC2-AS1	chr9	lincRNA	SMC2 antisense RNA 1 (head to head)
ENSG00000142606.15	-2.67799	-2.33526	0.00457034	0.135487	0.09	0.05	0.02	0	MMEL1	chr1	protein_coding	membrane metallo-endopeptidase-like 1
ENSG00000175065.11	5.20205	-2.83272	0.00409817	0.126877	0	0	0.05	0.01	DSG4	chr18	protein_coding	desmoglein 4
ENSG00000159208.15	-2.58174	-2.01349	0.00100415	0.0592694	0.22	0.08	0.01	0.03	CIART	chr1	protein_coding	circadian associated repressor of transcription
ENSG00000200879.1	1.86958	1.06094	1.01183e-15	1.9589e-12	8.26	9.06	27.15	32.84	SNORD14E	chr11	snoRNA	small nucleolar RNA, C/D box 14E
ENSG00000228903.6	-0.627641	0.943924	0.00487332	0.141808	0.47	0.5	0.25	0.34	RASA4CP	chr7	transcribed_unprocessed_pseudogene	RAS p21 protein activator 4C, pseudogene
ENSG00000279907.1	2.55092	-2.01364	0.00100415	0.0592694	0.03	0	0.11	0.09	RP11-568J23.2	chr16	TEC	--
ENSG00000188095.4	-1.03984	-0.634777	0.00802843	0.182001	0.33	0.42	0.14	0.2	MESP2	chr15	protein_coding	mesoderm posterior basic helix-loop-helix transcription factor 2
ENSG00000227376.1	1.21546	-0.396894	0.000540322	0.0401303	0.92	0.36	1.72	1.12	FTH1P16	chr11	processed_pseudogene	ferritin, heavy polypeptide 1 pseudogene 16
ENSG00000184378.2	-1.05102	-0.112333	0.00116745	0.0631334	0.6	0.38	0.34	0.12	ACTRT3	chr3	protein_coding	actin-related protein T3
ENSG00000138378.17	0.928786	-0.380444	0.00710489	0.177	0.1	0.14	0.32	0.11	STAT4	chr2	protein_coding	signal transducer and activator of transcription 4
ENSG00000034053.14	0.715457	0.917846	0.00159901	0.0775212	0.34	0.22	0.41	0.47	APBA2	chr15	protein_coding	amyloid beta (A4) precursor protein-binding, family A, member 2
ENSG00000231047.1	1.66546	-1.67264	0.00614451	0.16382	0.29	0.05	0.57	0.49	GCNT1P3	chr3	processed_pseudogene	glucosaminyl (N-acetyl) transferase 1, core 2 pseudogene 3
ENSG00000212128.2	-6.1168	-2.27622	1.82551e-05	0.0046914	0.1	0.19	0	0	TAS2R13	chr12	protein_coding	taste receptor, type 2, member 13
ENSG00000266538.1	-2.33777	-2.16529	0.00491738	0.141808	0.53	0.9	0.09	0.16	RP11-385D13.3	chr17	lincRNA	--
ENSG00000187902.11	5.60703	-2.5984	0.000532974	0.0396861	0	0	0.04	0.02	SHISA7	chr19	protein_coding	shisa family member 7
ENSG00000226690.6	-3.30692	-2.52806	0.00367993	0.12271	0.28	0.03	0.02	0	AC005281.1	chr7	lincRNA	--
ENSG00000111181.12	-0.830767	1.98668	1.9361e-06	0.000969383	1.29	0.94	0.56	0.62	SLC6A12	chr12	protein_coding	solute carrier family 6 (neurotransmitter transporter), member 12
ENSG00000172058.15	-3.95903	-2.11296	4.90202e-05	0.00961855	0.14	0.04	0.01	0	SERF1A	chr5	protein_coding	small EDRK-rich factor 1A (telomeric)
ENSG00000279294.1	1.58857	-1.08774	0.000695554	0.0460826	0.11	0.06	0.25	0.23	RP11-274A11.3	chr16	TEC	--
ENSG00000175018.12	-2.52769	-1.75035	0.0002314	0.0249178	0.55	0.19	0.09	0.03	TEX36	chr10	protein_coding	testis expressed 36
ENSG00000243978.8	-2.79836	-1.56287	1.61717e-05	0.0043484	0.11	0.04	0.01	0.01	RGAG1	chrX	protein_coding	retrotransposon gag domain containing 1
ENSG00000229082.1	5.72015	-2.52806	0.000270728	0.0256926	0	0	0.22	0.13	OR5AW1P	chrX	processed_pseudogene	olfactory receptor, family 5, subfamily AW, member 1 pseudogene
ENSG00000241313.2	1.33454	-1.24826	0.00679873	0.173189	0.05	0.08	0.14	0.18	WWTR1-AS1	chr3	antisense	WWTR1 antisense RNA 1
ENSG00000248265.1	0.753545	1.26946	0.000310058	0.0283147	0.42	0.33	0.7	0.51	FLJ12825	chr12	lincRNA	--
ENSG00000273004.1	-1.61938	-0.98943	0.000423703	0.0348348	0.75	0.76	0.18	0.27	GS1-279B7.2	chr1	lincRNA	--
ENSG00000143036.16	-0.730875	0.925963	0.00142643	0.071925	0.71	0.86	0.48	0.41	SLC44A3	chr1	protein_coding	solute carrier family 44, member 3
ENSG00000280273.1	-5.84118	-2.46066	0.000137694	0.0181756	0.07	0.18	0	0	AF131216.1	chr8	protein_coding	--
ENSG00000167850.3	-1.75801	-1.6348	0.00399557	0.126877	0.22	0.23	0.05	0.07	CD300C	chr17	protein_coding	CD300c molecule
ENSG00000257261.5	-0.717965	0.899733	0.00150271	0.0744686	0.84	0.92	0.38	0.63	RP11-96H19.1	chr12	lincRNA	--
ENSG00000229267.2	1.17879	-0.528634	0.00133421	0.0686978	0.18	0.16	0.31	0.42	AC072062.1	chr2	antisense	--
ENSG00000241644.2	0.954579	-0.234894	0.00450105	0.135216	0.22	0.13	0.23	0.41	INMT	chr7	protein_coding	indolethylamine N-methyltransferase
ENSG00000166578.9	0.590706	1.85117	0.000898315	0.055036	0.88	1.08	1.5	1.29	IQCD	chr12	protein_coding	IQ motif containing D
ENSG00000126500.3	5.03604	-2.92067	0.00810984	0.182001	0	0	0.01	0.05	FLRT1	chr11	protein_coding	fibronectin leucine rich transmembrane protein 1
ENSG00000279191.1	0.835138	1.62083	1.21362e-05	0.00342169	0.59	0.5	0.78	1.06	RP11-803D5.1	chr2	TEC	--
ENSG00000234614.1	-0.833737	0.401513	0.00136917	0.0696332	2.39	3.04	0.91	1.94	AL450992.2	chr1	antisense	--
ENSG00000202252.1	0.727801	0.58757	0.00317253	0.112767	9.25	11.67	18.51	14.39	SNORD14C	chr11	snoRNA	small nucleolar RNA, C/D box 14C
ENSG00000279467.1	0.975464	-0.599161	0.00907459	0.195349	0.05	0.04	0.06	0.1	KB-1125A3.12	chr22	antisense	--
ENSG00000160323.18	-1.74725	-0.349881	1.62577e-06	0.000843077	0.19	0.17	0.07	0.03	ADAMTS13	chr9	protein_coding	ADAM metallopeptidase with thrombospondin type 1 motif, 13
ENSG00000187922.13	-0.624036	0.794087	0.00707015	0.177	2.16	2.19	1.23	1.43	LCN10	chr9	protein_coding	lipocalin 10
ENSG00000250764.1	1.17323	-0.712438	0.00388967	0.126877	0.44	0.24	0.2	1.24	CTD-2152M20.2	chr5	antisense	--
ENSG00000261098.1	-0.711753	0.401541	0.00598772	0.160511	0.3	0.34	0.14	0.23	RP11-819C21.1	chr11	lincRNA	--
ENSG00000253175.1	5.2019	-2.8328	0.00409817	0.126877	0	0	0.51	0.14	RP11-267M23.6	chr8	processed_pseudogene	--
ENSG00000225192.1	-3.18445	-2.59841	0.00674452	0.172413	0.11	0.06	0	0.01	ZNF33BP1	chr10	processed_pseudogene	zinc finger protein 33B pseudogene 1
ENSG00000223343.1	1.64554	-1.39653	0.00213567	0.0873517	0.11	0.22	0.69	0.3	RP13-131K19.2	chr3	antisense	--
ENSG00000099984.10	2.30513	-1.87658	0.00109183	0.0606247	0.03	0.08	0.1	0.39	GSTT2	chr22	polymorphic_pseudogene	glutathione S-transferase theta 2 (gene/pseudogene)
ENSG00000262668.1	1.2278	-0.812275	0.00276659	0.103758	0.27	0.54	0.73	1.07	AJ003147.9	chr16	antisense	--
ENSG00000262664.2	-1.12871	-0.579835	0.00333841	0.115966	0.38	0.89	0.29	0.25	OVCA2	chr17	protein_coding	ovarian tumor suppressor candidate 2
ENSG00000148950.9	-0.733245	2.04632	1.77187e-05	0.00467774	4.14	3.89	2.39	2.18	IMMP1L	chr11	protein_coding	IMP1 inner mitochondrial membrane peptidase-like (S. cerevisiae)
ENSG00000277692.1	-6.34733	-2.11311	2.44785e-06	0.00114654	0.78	0.04	0	0	RP11-358N2.2	chr20	lincRNA	--
ENSG00000279814.1	5.2022	-2.83265	0.00409817	0.126877	0	0	0.15	0	RP11-399K21.12	chr10	TEC	--
ENSG00000281756.1	2.21467	-2.2201	0.0082457	0.182234	0.07	0.04	0.25	0.27	C2-AS1	chr6	antisense	C2 antisense RNA 1
ENSG00000105088.8	-0.67395	2.74285	5.78161e-06	0.00215254	3.29	3.36	2.12	1.83	OLFM2	chr19	protein_coding	olfactomedin 2
ENSG00000166183.15	1.37952	-0.580726	0.000276917	0.0259409	0.09	0.03	0.17	0.12	ASPG	chr14	protein_coding	asparaginase
ENSG00000259523.1	-2.97399	-1.75014	3.71718e-05	0.00805573	0.15	0.33	0	0.05	RP11-680F8.3	chr15	antisense	--
ENSG00000213152.5	1.6542	-1.52796	0.00360452	0.12271	0.11	0.18	0.55	0.33	RPL7AP60	chr12	processed_pseudogene	ribosomal protein L7a pseudogene 60
ENSG00000197943.9	-1.1235	-0.527967	0.00286892	0.105594	0.1	0.07	0.03	0.04	PLCG2	chr16	protein_coding	phospholipase C, gamma 2 (phosphatidylinositol-specific)
ENSG00000236760.1	5.03634	-2.92052	0.00810984	0.182001	0	0	0.09	0.14	AC019118.3	chr2	lincRNA	--
ENSG00000198939.7	1.94668	-1.49395	0.000671111	0.0455352	0.02	0.05	0.19	0.1	ZFP2	chr5	protein_coding	ZFP2 zinc finger protein
ENSG00000268163.1	-5.05265	-2.92012	0.00810984	0.182001	0	0.34	0	0	AC004076.9	chr19	protein_coding	--
ENSG00000224223.1	-3.30729	-2.52803	0.00367993	0.12271	0.07	0.04	0	0.01	VSTM2A-OT1	chr7	sense_overlapping	VSTM2A overlapping transcript 1
ENSG00000113205.4	-3.52548	-2.39661	0.00108371	0.0606247	0.04	0.04	0.01	0	PCDHB3	chr5	protein_coding	protocadherin beta 3
ENSG00000173376.13	1.94496	-1.49498	0.000671111	0.0455352	0.04	0.03	0.05	0.21	NDNF	chr4	protein_coding	neuron-derived neurotrophic factor
ENSG00000175899.14	-1.78119	-1.79136	0.00683229	0.173284	0.11	0.01	0.01	0.03	A2M	chr12	protein_coding	alpha-2-macroglobulin
ENSG00000242574.8	1.45313	-0.89865	0.00072566	0.0471436	0.14	0.16	0.29	0.5	HLA-DMB	chr6	protein_coding	major histocompatibility complex, class II, DM beta
ENSG00000269202.1	-2.2237	-1.71051	0.000685443	0.0457476	0.15	0.3	0.05	0.03	RP4-614O4.12	chr20	lincRNA	--
ENSG00000225880.5	0.632569	0.885346	0.00553193	0.153299	1.04	0.76	0.97	1.67	LINC00115	chr1	lincRNA	long intergenic non-protein coding RNA 115
ENSG00000224596.7	-0.814535	1.54413	2.4769e-05	0.00609569	0.55	0.85	0.34	0.41	ZMIZ1-AS1	chr10	antisense	ZMIZ1 antisense RNA 1
ENSG00000134183.11	5.20145	-2.83303	0.00409817	0.126877	0	0	0.08	0.1	GNAT2	chr1	protein_coding	guanine nucleotide binding protein (G protein), alpha transducing activity polypeptide 2
ENSG00000261787.1	2.2238	-1.30579	3.99691e-05	0.00853459	0	0.08	0.19	0.18	TCF24	chr8	protein_coding	transcription factor 24
ENSG00000267311.1	2.64766	-2.33552	0.00457034	0.135487	0.03	0.03	0.17	0.16	RP11-99A1.2	chr18	lincRNA	--
ENSG00000267395.5	-1.63384	-1.71092	0.00938088	0.198268	0.36	0.25	0.05	0.13	AC074212.6	chr19	antisense	--
ENSG00000279086.1	2.21482	-2.22002	0.0082457	0.182234	0.02	0.01	0.1	0.08	RP11-667F14.1	chr7	TEC	--
ENSG00000227051.5	1.08897	0.0797434	0.000228053	0.024804	0.06	0.08	0.16	0.11	C14orf132	chr14	lincRNA	chromosome 14 open reading frame 132
ENSG00000205277.9	-0.604096	1.10849	0.00555646	0.153822	0.12	0.13	0.09	0.07	MUC12	chr7	protein_coding	mucin 12, cell surface associated
ENSG00000276851.1	-1.34284	-1.16536	0.00584759	0.158809	1.11	0.49	0.37	0.22	RP5-875H18.9	chr17	lincRNA	--
ENSG00000173918.14	-0.689841	2.58605	6.81618e-06	0.00243614	1.52	1.35	0.83	0.85	C1QTNF1	chr17	protein_coding	C1q and tumor necrosis factor related protein 1
ENSG00000135929.8	1.22443	-0.61755	0.00129258	0.0669101	0.16	0.1	0.19	0.38	CYP27A1	chr2	protein_coding	cytochrome P450, family 27, subfamily A, polypeptide 1
ENSG00000269984.1	3.00391	-2.11358	0.000472125	0.0371558	0.02	0	0.03	0.12	RP11-362K14.5	chr3	antisense	--
ENSG00000137285.9	1.29156	-0.920865	0.00264708	0.100617	0.08	0.14	0.2	0.32	TUBB2B	chr6	protein_coding	tubulin, beta 2B class IIb
ENSG00000154721.14	-5.49978	-2.67236	0.0010506	0.0600581	0.04	0.02	0	0	JAM2	chr21	protein_coding	junctional adhesion molecule 2
ENSG00000252908.1	3.0042	-2.11343	0.000472125	0.0371558	0.53	0	1.55	2.95	RNU6-1003P	chr5	snRNA	RNA, U6 small nuclear 1003, pseudogene
ENSG00000224525.2	-2.19195	-1.52797	0.000264556	0.0256926	0.7	0.34	0.11	0.1	RP11-561I11.3	chr1	antisense	--
ENSG00000281195.1	0.645034	1.24424	0.00209268	0.086227	0.83	1.06	1.41	1.39	ZNF638-IT1	chr2	processed_transcript	ZNF638 intronic transcript 1
ENSG00000223703.1	1.81515	-1.75122	0.00437312	0.132242	0.07	0	0.05	0.19	AC027612.4	chr2	unprocessed_pseudogene	--
ENSG00000229775.6	5.48411	-2.67243	0.0010506	0.0600581	0	0	0.1	0.05	RP11-298H24.1	chr10	lincRNA	--
ENSG00000167011.8	-0.814517	0.0571021	0.00766904	0.182001	0.34	0.22	0.17	0.14	NAT16	chr7	protein_coding	N-acetyltransferase 16 (GCN5-related, putative)
ENSG00000273265.1	1.93947	-1.67272	0.00175568	0.0817064	0	0.41	0.59	0.93	RP11-353K11.1	chr2	lincRNA	--
ENSG00000273113.1	2.23648	-1.92074	0.00181332	0.082406	0.14	0	0.27	0.39	RP11-367H1.1	chr2	lincRNA	--
ENSG00000280378.1	1.53213	-0.478213	3.27375e-05	0.00748581	0.19	0.13	0.37	0.52	RP4-758J24.6	chr1	TEC	--
ENSG00000228109.1	-0.973288	-0.0133078	0.0018743	0.0838671	1.18	1.02	0.49	0.57	MFI2-AS1	chr3	antisense	MFI2 antisense RNA 1
ENSG00000257184.3	0.709452	0.89838	0.00226636	0.0910575	1.36	1.68	1.7	2.97	HOXA10-HOXA9	chr7	protein_coding	--
ENSG00000251379.1	1.78659	-0.673466	9.98234e-06	0.0030839	0.26	0.23	0.53	1.07	RP11-484O2.1	chr4	antisense	--
